# Supplementary material for: Amphiphile catalysed selective synthesis of 4-amino alkylated-1H-pyrazol-5-ol via Mannich aromatization preferred to the Knoevenagel–Michael type reaction in water
Source: Royal Society of Chemistry journal article supplement (doi:10.1039/c4ra11961d), 2014-01-01
Supplement: c4ra11961d1.pdf [file c4ra11961d1.pdf]

## Supporting Information

### **Amphiphile catalysed selective synthesis of 4-Amino alkylated- 1H-pyrazol-5-ol via Mannich-aromatization prefer over Knoevenagel-Michael type reaction in water**

Atul Kumar,<sup>a,b\*</sup> Shivam Maurya,<sup>a,b</sup> Maneesh Kumar Gupta<sup>a</sup> and Ratnakar Dutt Shukla<sup>a</sup>

<sup>a</sup>*Medicinal and Process Chemistry Division, CSIR-Central Drug Research Institute, Sector 10, Jankipuram Extension, Lucknow-226031 India.*

<sup>b</sup>*Academy of Scientific & Innovative Research (AcSIR) New Delhi*

*E-mail: dratulsax@gmail.com*

#### **Table of Contents**

|           |                                                                                          |              |
|-----------|------------------------------------------------------------------------------------------|--------------|
| <b>1.</b> | General information                                                                      | <b>2</b>     |
| <b>2.</b> | General procedure for the preparation of 11.                                             | <b>2</b>     |
| <b>3.</b> | Spectroscopic Data of 4-Amino alkylated-1H-pyrazol-5-ols.                                | <b>3-10</b>  |
| <b>4.</b> | Spectral Charts ( <sup>1</sup> H NMR and <sup>13</sup> C NMR ) of synthesized compounds. | <b>11-29</b> |
| <b>5.</b> | HPLC parameters of synthesized compounds.                                                | <b>30-38</b> |

## 1. General information

All reagents and solvents were purchased from commercial sources and used as received. The progress of the reaction was monitored by analytical TLC on silica gel G/GF 254 plates. Reagent grade solvents were used for extraction and flash chromatography. Whereas HPLC grade solvent were used for HPLC. The column chromatography was performed with silica gel 230-400 mesh. NMR ( $^1\text{H}$  and  $^{13}\text{C}$ ) spectra were recorded on a 400 MHz using TMS as an internal standard and chemical shifts ( $\delta$  ppm) (multiplicity, coupling constant (Hz), integration). The abbreviations for multiplicity are as follows: s = singlet, d = doublet, t = triplet, q = quartet, m = multiplet, dd = doublet of doublets. Melting points are uncorrected were determined in capillary tubes on a hot stage melting point apparatus containing silicon oil. High-resolution mass spectra (ESI-HRMS) were recorded on Agilent 6520 ESI-QTOP mass spectrometer.. IR spectra were recorded using a FTIR spectrophotometer.

## 2. General procedure for the preparation of 11.

In a typical experiment, the aromatic aldehyde (1 mmol), secondary amine (1.2 mmol) and SDS (20 mol%) were taken in water (2 mL) in a round-bottom flask and stirred at 80 °C temperature for 4 min. A white turbid mixture was obtained and then 3-methyl-1-phenyl-5-pyrazolinone (1 mmol) was added. The reaction mixture was stirred for 2 h until completion of the reaction (monitored by TLC). After completion of the reaction, the mixture was extracted with ethyl acetate, evaporated under vacuum to give the crude product which was purified by silica gel (230–400 mesh) column chromatography (hexane–ethyl acetate) to afford the corresponding product.

### 3-Methyl-1-phenyl-4-(phenyl(piperidin-1-yl)methyl)-1H-pyrazol-5-ol (11a).

**Physical state:** Creamy white solid; **Yield:** 91% (316.1 mg); **Mp:** 219-221 °C; **<sup>1</sup>H NMR (400 MHz, DMSO-*d*<sub>6</sub>) δ (ppm):** 1.51 - 1.59 (m, 2 H), 1.59 - 1.68 (m, 4 H), 2.16 (s, 3 H), 2.99 (t, *J* = 5.6 Hz, 4 H), 4.62 (s, 1 H), 7.01 - 7.09 (m, 2 H), 7.17 - 7.22 (m, 1 H), 7.28 - 7.33 (m, 3 H), 7.38 (d, *J* = 7.36 Hz, 1 H), 7.93 - 7.96 (m, 3 H); **<sup>13</sup>C NMR (100 MHz, DMSO-*d*<sub>6</sub>) δ (ppm):** 13.57, 22.09, 22.72, 35.38, 44.27, 102.44, 119.48, 123.27, 125.29, 127.80, 128.11, 128.68, 141.31, 146.29, 147.31, 157.75. **ESIMS:** *m/z* 348 (M+H)<sup>+</sup>. **IR (KBr):** 3414, 3019, 2400, 1597, 1501, 1384, 1216, 1122, 770, 669 cm<sup>-1</sup>; **Elemental analysis** calculated for C<sub>22</sub>H<sub>25</sub>N<sub>3</sub>O: C, 76.05; H, 7.25; N, 12.09%; found: C, 76.07; H, 7.26; N, 12.10%; **HRMS (ES):** calculated for [M+H] 348.2076; found: 348.2068; **HPLC analysis** by using a Chiralpak IA column (hexane/2-propanol = 80/20, flow rate 1.0 ml/min, T = 25°C, 254 nm); *t*<sub>1</sub> = 11.96 min, *t*<sub>2</sub> = 13.81 min.

### 4-((4-chlorophenyl)(piperidin-1-yl)methyl)-3-methyl-1-phenyl-1H-pyrazol-5-ol (11b).

**Physical state:** White solid; **Yield:** 92% (351.3 mg); **Mp:** 221-223 °C; **<sup>1</sup>H NMR (400 MHz, DMSO-*d*<sub>6</sub>) δ (ppm):** 1.47 - 1.56 (m, 2 H), 1.56 - 1.65 (m, 4 H), 2.19 (s, 3 H), 2.95 (t, *J* = 5.5 Hz, 4 H), 4.66 (s, 1 H), 7.06 (t, *J* = 7.3 Hz, 1 H), 7.28 (d, *J* = 8.5 Hz, 1 H), 7.34 (t, *J* = 7.9 Hz, 3 H), 7.40 (d, *J* = 8.4 Hz, 1 H), 7.97 (d, *J* = 7.7 Hz, 3 H); **<sup>13</sup>C NMR (100 MHz, DMSO-*d*<sub>6</sub>) δ (ppm):** 13.52, 22.07, 22.69, 34.75, 44.25, 102.21, 119.56, 123.41, 128.01, 128.73, 129.70, 129.96, 141.25, 146.05, 146.22, 157.75. **ESIMS:** *m/z* 382 (M+H)<sup>+</sup>. **IR (KBr):** 3395, 2927, 2430, 1590, 1485, 1382, 1216, 1116, 1084, 1034, 765, 692 cm<sup>-1</sup>; **Elemental analysis** calculated for C<sub>22</sub>H<sub>24</sub>ClN<sub>3</sub>O: C, 69.19; H, 6.33; N, 11.00%; found: C, 69.20; H, 6.32; N, 11.01%; **HRMS (ES):** calculated for [M+H] 382.1686; found: 382.1688; **HPLC analysis** by using a Chiralpak IA column (hexane/2-propanol = 80/20, flow rate 1.0 ml/min, T = 25°C, 254 nm); *t*<sub>1</sub> = 11.94 min, *t*<sub>2</sub> = 13.78 min.

### 4-((2-Chlorophenyl)(piperidin-1-yl)methyl)-3-methyl-1-phenyl-1H-pyrazol-5-ol (11c)

**Physical state:** White solid; **Yield:** 88% (336.0 mg); **Mp:** 203-205 °C; **<sup>1</sup>H NMR (400 MHz, DMSO-*d*<sub>6</sub>) δ (ppm):** 1.49 - 1.56 (m, 2 H), 1.58 - 1.65 (m, 4 H), 2.20 (s, 3 H), 2.97 (t, *J* = 5.5 Hz, 4 H), 5.05 (s, 1 H), 7.03 - 7.08 (m, 2 H), 7.30 - 7.35 (m, 4 H), 7.95 (dd, *J* = 8.6, 1.1 Hz, 3 H); **<sup>13</sup>C NMR (100 MHz, DMSO-*d*<sub>6</sub>) δ (ppm):** 13.79, 22.07, 22.69, 32.74, 44.25, 101.86, 119.60, 123.44, 126.98, 127.25, 128.72, 129.16, 131.50, 141.17, 144.05, 146.08, 158.14. **ESIMS:** *m/z* 382 (M+H)<sup>+</sup>. **IR (KBr):** 3684, 3405, 3021, 2929, 2741, 2401, 1594, 1501,

1428, 1382, 1215, 1119, 758, 670  $\text{cm}^{-1}$ ; **Elemental analysis** calculated for  $\text{C}_{22}\text{H}_{24}\text{ClN}_3\text{O}$ : C, 69.19; H, 6.33; N, 11.00%; found: C, 69.18; H, 6.32; N, 11.02%; **HRMS (ES)**: calculated for  $[\text{M}+\text{H}]$  382.1686; found: 382.1684; **HPLC analysis** by using a Chiralpak IA column (hexane/2-propanol = 80/20, flow rate 1.0 ml/min, T = 25°C, 254 nm);  $t_1$  = 11.93 min,  $t_2$  = 13.76 min.

#### **4-((2,4-Dichlorophenyl)(piperidin-1-yl)methyl)-3-methyl-1-phenyl-1H-pyrazol-5-ol (11d)**

**Physical state:** White solid; **Yield:** 84% (349.7 mg); **Mp:** 225-227 °C;  **$^1\text{H}$  NMR (400 MHz, DMSO- $d_6$ )  $\delta$  (ppm):** 1.48 - 1.57 (m, 2 H), 1.57 - 1.67 (m, 4 H), 2.18 (s, 3 H), 2.98 (t,  $J$  = 5.1 Hz, 4 H), 4.98 (s, 1 H), 7.06 (t,  $J$  = 7.2 Hz, 1 H), 7.30 - 7.36 (m, 4 H), 7.93 (d,  $J$  = 7.9 Hz, 2 H), 8.10 (d,  $J$  = 8.5 Hz, 1 H);  **$^{13}\text{C}$  NMR (100 MHz, DMSO- $d_6$ )  $\delta$  (ppm):** 13.69, 22.09, 22.72, 32.47, 44.28, 101.42, 119.60, 123.53, 127.05, 128.48, 128.74, 130.80, 132.41, 132.60, 141.07, 142.90, 145.99, 158.09. **ESIMS:**  $m/z$  416 ( $\text{M}+\text{H}$ )<sup>+</sup>. **IR (KBr):** 3423, 3020, 2518, 1592, 1470, 1382, 1216, 1159, 1115, 1069, 1033, 763, 671  $\text{cm}^{-1}$ ; **Elemental analysis** calculated for  $\text{C}_{22}\text{H}_{23}\text{Cl}_2\text{N}_3\text{O}$ : C, 63.47; H, 5.57; N, 10.09%; found: C, 63.46; H, 5.57; N, 10.10%; **HRMS (ES)**: calculated for  $[\text{M}+\text{H}]$  416.1296; found: 416.1287; **HPLC analysis** by using a Chiralpak IA column (hexane/2-propanol = 80/20, flow rate 1.0 ml/min, T = 25°C, 254 nm);  $t_1$  = 11.90 min,  $t_2$  = 13.73 min.

#### **4-((4-Fluorophenyl)(piperidin-1-yl)methyl)-3-methyl-1-phenyl-1H-pyrazol-5-ol (11e)**

**Physical state:** pale white solid; **Yield:** 91% (332.5 mg); **Mp:** 218-220 °C;  **$^1\text{H}$  NMR (400 MHz, DMSO- $d_6$ )  $\delta$  (ppm):** 1.48 - 1.56 (m, 2 H), 1.57 - 1.67 (m, 4 H), 2.18 (s, 3 H), 2.97 (t,  $J$  = 5.4 Hz, 4 H), 4.64 (s, 1 H), 7.00 - 7.08 (m, 3 H), 7.30 - 7.35 (m, 3 H), 7.38 - 7.42 (m, 1 H), 7.96 (d,  $J$  = 8.5 Hz, 2 H);  **$^{13}\text{C}$  NMR (100 MHz, DMSO- $d_6$ )  $\delta$  (ppm):** 13.52, 22.07, 22.69, 34.61, 44.25, 102.49, 114.52, 114.72, 119.53, 123.37, 128.71, 129.40, 129.47, 141.26, 146.20, 157.72. **ESIMS:**  $m/z$  366 ( $\text{M}+\text{H}$ )<sup>+</sup>. **IR (KBr):** 3685, 3418, 3021, 2933, 2859, 2740, 2513, 1594, 1501, 1421, 1216, 1118, 769, 671  $\text{cm}^{-1}$ ; **Elemental analysis** calculated for  $\text{C}_{22}\text{H}_{24}\text{FN}_3\text{O}$ : C, 72.31; H, 6.62; N, 11.50%; found: C, 72.33; H, 6.60; N, 11.51%; **HRMS (ES)**: calculated for  $[\text{M}+\text{H}]$  366.1981; found: 366.1971; **HPLC analysis** by using a Chiralpak IA column (hexane/2-propanol = 80/20, flow rate 1.0 ml/min, T = 25°C, 254 nm);  $t_1$  = 11.92 min,  $t_2$  = 13.82 min.



**4-((4-Methoxyphenyl)(piperidin-1-yl)methyl)-3-methyl-1-phenyl-1H-pyrazol-5-ol (11f)**

**Physical state:** White solid; **Yield:** 86% (324.6 mg); **Mp:** 223-225 °C; **<sup>1</sup>H NMR (400 MHz, DMSO-*d*<sub>6</sub>) δ (ppm):** 1.49 - 1.55 (m, 2 H), 1.55 - 1.64 (m, 4 H), 2.18 (s, 3 H), 2.95 (t, *J* = 5.1 Hz, 4 H), 3.70 (s, 3 H), 4.61 (s, 1 H), 6.78 (d, *J* = 8.5 Hz, 1 H), 7.05 (t, *J* = 7.2 Hz, 1 H), 7.32 (q, *J* = 7.7 Hz, 5 H), 7.97 (d, *J* = 7.9 Hz, 2 H); **<sup>13</sup>C NMR (100 MHz, DMSO-*d*<sub>6</sub>) δ (ppm):** 13.55, 22.06, 22.69, 34.46, 44.26, 55.42, 102.81, 113.56, 119.54, 123.33, 128.69, 128.72, 139.30, 141.31, 146.30, 157.34, 157.69. **ESIMS:** *m/z* 378 (M+H)<sup>+</sup>. **IR (KBr):** 3423, 3020, 2518, 1592, 1470, 1382, 1216, 1159, 1115, 763, 671 cm<sup>-1</sup>; **Elemental analysis** calculated for C<sub>23</sub>H<sub>27</sub>N<sub>3</sub>O<sub>2</sub>: C, 73.18; H, 7.21; N, 11.13%; found: C, 73.20; H, 7.18; N, 11.14%; **HRMS (ES):** calculated for [M+H] 378.2181; found: 378.2175; **HPLC analysis** by using a Chiralpak IA column (hexane/2-propanol = 80/20, flow rate 1.0 ml/min, T = 25°C, 254 nm); t<sub>1</sub> = 11.12 min, t<sub>2</sub> = 13.96 min.

**4-((3,4-Dimethoxyphenyl)(piperidin-1-yl)methyl)-3-methyl-1-phenyl-1H-pyrazol-5-ol (11g)**

**Physical state:** White solid; **Yield:** 88% (358.6 mg); **Mp:** 222-224 °C; **<sup>1</sup>H NMR (400 MHz, DMSO-*d*<sub>6</sub>) δ (ppm):** 1.49 - 1.56 (m, 2 H), 1.58 - 1.65 (m, 4 H), 2.20 (s, 3 H), 2.97 (t, *J* = 5.0 Hz, 4 H), 3.63 (s, 3 H), 3.73 (s, 3 H), 4.56 (s, 1 H), 6.87 (s, 1 H), 7.06 (t, *J* = 7.0 Hz, 2 H), 7.34 (t, *J* = 7.5 Hz, 3 H), 7.97 (d, *J* = 7.9 Hz, 2 H); **<sup>13</sup>C NMR (100 MHz, DMSO-*d*<sub>6</sub>) δ (ppm):** 13.63, 22.08, 22.72, 36.10, 44.29, 56.23, 60.35, 102.54, 105.41, 119.66, 123.38, 128.71, 135.77, 141.26, 143.72, 146.31, 152.70, 157.60. **ESIMS:** *m/z* 408 (M+H)<sup>+</sup>. **IR (KBr):** 3407, 3018, 2927, 1597, 1500, 1456, 1385, 1216, 1118, 759, 668 cm<sup>-1</sup>; **Elemental analysis** calculated for C<sub>24</sub>H<sub>29</sub>N<sub>3</sub>O<sub>3</sub>: C, 70.74; H, 7.17; N, 10.31%; found: C, 70.72; H, 7.18; N, 10.32%; **HRMS (ES):** calculated for [M+H] 408.2287; found: 408.2279; **HPLC analysis** by using a Chiralpak IA column (hexane/2-propanol = 80/20, flow rate 1.0 ml/min, T = 25°C, 254 nm); t<sub>1</sub> = 11.16 min, t<sub>2</sub> = 13.31 min.

**4-((2,5-Dimethoxyphenyl)(piperidin-1-yl)methyl)-3-methyl-1-phenyl-1H-pyrazol-5-ol (11h)**

**Physical state:** White solid; **Yield:** 86% (350.4 mg); **Mp:** 221-223 °C; **<sup>1</sup>H NMR (400 MHz, DMSO-*d*<sub>6</sub>) δ (ppm):** 1.49 - 1.56 (m, 2 H), 1.56 - 1.67 (m, 4 H), 2.14 (s, 3 H), 2.97 (t, *J* = 5.4 Hz, 4 H), 3.65 (s, 3 H), 3.75 (s, 3 H), 5.04 (s, 1 H), 6.62 (dd, *J* = 8.8, 3.2 Hz, 1 H), 6.77 (d, *J* = 8.8 Hz, 1 H), 7.02 - 7.06 (m, 1 H), 7.32 (t, *J* = 7.9 Hz, 2 H), 7.55 (d, *J* = 3.0 Hz, 1 H), 7.95

(d,  $J = 7.7$  Hz, 2 H);  $^{13}\text{C}$  NMR (100 MHz, DMSO- $d_6$ )  $\delta$  (ppm): 13.49, 22.10, 22.74, 28.23, 44.29, 55.52, 56.30, 102.40, 109.71, 111.28, 117.03, 119.49, 123.20, 128.68, 136.57, 141.36, 146.46, 150.24, 153.23, 158.19. **ESIMS**:  $m/z$  408 (M+H) $^+$ . **IR (KBr)**: 3414, 3019, 2930, 1597, 1503, 1384, 1215, 1119, 669  $\text{cm}^{-1}$ ; **Elemental analysis** calculated for  $\text{C}_{24}\text{H}_{29}\text{N}_3\text{O}_3$ : C, 70.74; H, 7.17; N, 10.31%; found: C, 70.75; H, 7.15; N, 10.33%; **HRMS (ES)**: calculated for [M+H] 408.2287; found: 408.2273; **HPLC analysis** by using a Chiralpak IA column (hexane/2-propanol = 80/20, flow rate 1.0 ml/min,  $T = 25^\circ\text{C}$ , 254 nm);  $t_1 = 11.54$  min,  $t_2 = 13.26$  min.

### 3-Methyl-4-(naphthalen-1-yl(piperidin-1-yl)methyl)-1-phenyl-1H-pyrazol-5-ol (11i)

**Physical state**: Pale brown solid; **Yield**: 81% (321.9 mg); **Mp**: 194-196  $^\circ\text{C}$ ;  $^1\text{H}$  NMR (400 MHz, DMSO- $d_6$ )  $\delta$  (ppm): 1.48 - 1.55 (m, 2 H), 1.56 - 1.64 (m, 4 H), 2.27 (s, 3 H), 2.96 (t,  $J = 4.8$  Hz, 4 H), 5.38 (s, 1 H), 7.02 - 7.06 (m, 2 H), 7.28 - 7.33 (m, 3 H), 7.42 - 7.47 (m, 2 H), 7.68 - 7.78 (m, 2 H), 7.95 (dd,  $J = 8.6, 1.0$  Hz, 3 H);  $^{13}\text{C}$  NMR (100 MHz, DMSO- $d_6$ )  $\delta$  (ppm): 13.86, 22.11, 22.74, 31.84, 44.27, 103.23, 119.47, 123.34, 124.59, 125.17, 125.79, 125.84, 125.87, 126.24, 126.72, 127.41, 128.69, 129.21, 129.51, 131.31, 134.06, 135.74, 137.26, 141.22, 145.52, 158.44. **ESIMS**:  $m/z$  398 (M+H) $^+$ . **IR (KBr)**: 3418, 3010, 2402, 1596, 1578, 1503, 1422, 1385, 1215, 1125, 928, 769, 693  $\text{cm}^{-1}$ ; **Elemental analysis** calculated for  $\text{C}_{26}\text{H}_{27}\text{N}_3\text{O}$ : C, 78.56; H, 6.85; N, 10.57%; found: C, 78.53; H, 6.87; N, 10.55%; **HRMS (ES)**: calculated for [M+H] 398.2232; found: 398.2226; **HPLC analysis** by using a Chiralpak IA column (hexane/2-propanol = 80/20, flow rate 1.0 ml/min,  $T = 25^\circ\text{C}$ , 254 nm);  $t_1 = 12.05$  min,  $t_2 = 13.85$  min.

### 3-Methyl-1-phenyl-4-(piperidin-1-yl(pyridin-4-yl)methyl)-1H-pyrazol-5-ol (11j)

**Physical state**: pale purple solid; **Yield**: 87% (303.1 mg); **Mp**: 207-209  $^\circ\text{C}$ ;  $^1\text{H}$  NMR (400 MHz, DMSO- $d_6$ )  $\delta$  (ppm): 1.49 - 1.56 (m, 2 H), 1.57 - 1.65 (m, 4 H), 2.19 (s, 3 H), 2.97 (t,  $J = 5.5$  Hz, 4 H), 4.63 (s, 1 H), 7.06 (tt,  $J = 7.3, 1.2$  Hz, 1 H), 7.30 - 7.37 (m, 5 H), 7.96 (dd,  $J = 8.6, 1.0$  Hz, 2 H), 8.40 (d,  $J = 4.7$  Hz, 1 H);  $^{13}\text{C}$  NMR (100 MHz, DMSO- $d_6$ )  $\delta$  (ppm): 13.47, 22.09, 22.72, 34.88, 44.26, 101.28, 119.60, 123.37, 123.51, 128.75, 141.16, 146.28, 149.48, 155.61, 157.82. **ESIMS**:  $m/z$  349 (M+H) $^+$ . **IR (KBr)**: 3414, 3020, 2403, 1594, 1496, 1384, 1216, 1116, 1071, 1030, 764, 670  $\text{cm}^{-1}$ ; **Elemental analysis** calculated for  $\text{C}_{21}\text{H}_{24}\text{N}_4\text{O}$ : C, 72.39; H, 6.94; N, 16.08%; found: C, 72.40; H, 6.93; N, 16.09%; **HRMS (ES)**: calculated

349.2028; found: 349.2021; **HPLC analysis** by using a Chiralpak IA column (hexane/2-propanol = 80/20, flow rate 1.0 ml/min, T = 25°C, 254 nm); t<sub>1</sub> = 9.58 min, t<sub>2</sub> = 10.83 min.

### **3-Methyl-1-phenyl-4-(phenyl(pyrrolidin-1-yl)methyl)-1H-pyrazol-5-ol (11k)**

**Physical state:** Pale brown solid; **Yield:** 90% (300.9 mg); **Mp:** 215-217 °C; **<sup>1</sup>H NMR (400 MHz, DMSO-*d*<sub>6</sub>) δ (ppm):** 1.77 - 1.83 (m, 4 H), 2.18 (s, 3 H), 3.02 - 3.10 (m, 4 H), 4.65 (s, 1 H), 7.03 - 7.09 (m, 2 H), 7.21 (t, *J* = 7.6 Hz, 1 H), 7.30 - 7.35 (m, 3 H), 7.41 (d, *J* = 7.6 Hz, 1 H), 7.95 - 7.98 (m, 3 H); **<sup>13</sup>C NMR (100 MHz, DMSO-*d*<sub>6</sub>) δ (ppm):** 13.59, 24.07, 35.40, 45.39, 102.47, 119.54, 123.33, 125.32, 127.82, 128.14, 128.71, 141.33, 146.33, 147.30, 157.75. **ESIMS:** m/z 334 (M+H)<sup>+</sup>. **IR (KBr):** 3409, 3019, 2400, 1597, 1501, 1384, 1251, 929, 759, 696 cm<sup>-1</sup>; **Elemental analysis** calculated for C<sub>21</sub>H<sub>23</sub>N<sub>3</sub>O: C, 75.65; H, 6.95; N, 12.60%; found: C, 75.66; H, 6.94; N, 12.62%; **HRMS (ES):** calculated for [M+H] 334.1919; found: 334.1911; **HPLC analysis** by using a Chiralpak IA column (hexane/2-propanol = 80/20, flow rate 1.0 ml/min, T = 25°C, 254 nm); t<sub>1</sub> = 10.32 min, t<sub>2</sub> = 12.20 min.

### **4-((2-Chlorophenyl)(pyrrolidin-1-yl)methyl)-3-methyl-1-phenyl-1H-pyrazol-5-ol (11l)**

**Physical state:** Brown solid; **Yield:** 92% (338.4 mg); **Mp:** 195-197 °C; **<sup>1</sup>H NMR (400 MHz, DMSO-*d*<sub>6</sub>) δ (ppm):** 1.73 - 1.82 (m, 4 H), 2.23 (s, 3 H), 3.04 (t, *J* = 6.7 Hz, 4 H), 5.09 (s, 1 H), 7.05 - 7.16 (m, 3 H), 7.34 (t, *J* = 7.8 Hz, 4 H), 7.98 (d, *J* = 8.1 Hz, 2 H); **<sup>13</sup>C NMR (100 MHz, DMSO-*d*<sub>6</sub>) δ (ppm):** 13.82, 24.09, 32.79, 45.35, 101.90, 119.66, 123.48, 126.98, 127.26, 128.74, 129.17, 131.53, 131.54, 141.20, 144.07, 146.13, 158.16. **ESIMS:** m/z 368 (M+H)<sup>+</sup>. **IR (KBr):** 3410, 3019, 1598, 1501, 1384, 1215, 1121, 758, 694 cm<sup>-1</sup>; **Elemental analysis** calculated for C<sub>21</sub>H<sub>22</sub>ClN<sub>3</sub>O: C, 68.56; H, 6.03; N, 11.42%; found: C, 68.55; H, 6.01; N, 11.44%; **HRMS (ES):** calculated for [M+H] 368.1529; found: 368.1519; **HPLC analysis** by using a Chiralpak IA column (hexane/2-propanol = 80/20, flow rate 1.0 ml/min, T = 25°C, 254 nm); t<sub>1</sub> = 10.60 min, t<sub>2</sub> = 12.06 min.

### **4-((4-Methoxyphenyl)(pyrrolidin-1-yl)methyl)-3-methyl-1-phenyl-1H-pyrazol-5-ol (11m)**

**Physical state:** Brown solid; **Yield:** 88% (319.8 mg); **Mp:** 233-235 °C; **<sup>1</sup>H NMR (400 MHz, DMSO-*d*<sub>6</sub>) δ (ppm):** 1.78 - 1.85 (m, 4 H), 2.15 (s, 3 H), 3.05 - 3.11 (m, 4 H), 3.68 (s, 3 H), 4.58 (s, 1 H), 6.75 - 6.78 (m, 1 H), 7.01 - 7.06 (m, 1 H), 7.26 - 7.33 (m, 5 H), 7.95 (dd, *J* = 8.6, 1.0 Hz, 2 H); **<sup>13</sup>C NMR (100 MHz, DMSO-*d*<sub>6</sub>) δ (ppm):** 13.56, 24.08, 34.46, 45.40,

55.41, 102.77, 113.54, 119.47, 123.25, 128.68, 139.34, 141.34, 146.23, 157.31, 157.71. **ESIMS:**  $m/z$  364 (M+H)<sup>+</sup>. **IR (KBr):** 3396, 2922, 2422, 1596, 1500, 1386, 1245, 1031, 769, 691 cm<sup>-1</sup>; **Elemental analysis** calculated for C<sub>22</sub>H<sub>25</sub>N<sub>3</sub>O<sub>2</sub>: C, 72.70; H, 6.93; N, 11.56%; found: C, 72.72; H, 6.91; N, 11.57%; **HRMS (ES):** calculated for [M+H] 364.2025; found: 364.2010; **HPLC analysis** by using a Chiralpak IA column (hexane/2-propanol = 80/20, flow rate 1.0 ml/min, T = 25°C, 254 nm); t<sub>1</sub> = 10.49 min, t<sub>2</sub> = 12.32 min.

### **3-Methyl-1-phenyl-4-(pyridin-4-yl(pyrrolidin-1-yl)methyl)-1H-pyrazol-5-ol (11n)**

**Physical state:** Pale purple solid; **Yield:** 86% (287.6 mg); **Mp:** 208-210 °C; **<sup>1</sup>H NMR (400 MHz, DMSO-*d*<sub>6</sub>) δ (ppm):** 1.78 - 1.84 (m, 4 H), 2.18 (s, 3 H), 3.04 - 3.11 (m, 4 H), 4.63 (s, 1 H), 7.04 - 7.08 (m, 1 H), 7.30 - 7.36 (m, 4 H), 7.95 (dd, *J* = 8.6, 1.0 Hz, 3 H), 8.39 (d, *J* = 5.8 Hz, 1 H); **<sup>13</sup>C NMR (100 MHz, DMSO-*d*<sub>6</sub>) δ (ppm):** 13.49, 24.07, 34.88, 45.40, 101.27, 119.57, 123.35, 123.48, 128.74, 141.18, 146.25, 149.49, 155.59, 157.83. **ESIMS:**  $m/z$  335 (M+H)<sup>+</sup>. **IR (KBr):** 3411, 3019, 1654, 1384, 1215, 1084, 769, 669 cm<sup>-1</sup>; **Elemental analysis** calculated for C<sub>20</sub>H<sub>22</sub>N<sub>4</sub>O: C, 71.83; H, 6.63; N, 16.75%; found: C, 71.84; H, 6.64; N, 16.74%; **HRMS (ES):** calculated for [M+H] 335.1872; found: 335.1855; **HPLC analysis** by using a Chiralpak IA column (hexane/2-propanol = 80/20, flow rate 1.0 ml/min, T = 25°C, 254 nm); t<sub>1</sub> = 9.49 min, t<sub>2</sub> = 10.91 min.

### **4-((4-Fluorophenyl)(morpholino)methyl)-3-methyl-1-phenyl-1H-pyrazol-5-ol (11o)**

**Physical state:** Yellowish brown solid; **Yield:** 87% (319.6 mg); **Mp:** 186-188 °C; **<sup>1</sup>H NMR (400 MHz, DMSO-*d*<sub>6</sub>) δ (ppm):** 2.22 (s, 3 H), 3.08 (t, *J* = 4.8 Hz, 4 H), 3.75 (t, *J* = 4.8 Hz, 4 H), 4.73 (s, 1 H), 7.02 - 7.13 (m, 3 H), 7.33 - 7.42 (m, 4 H), 7.93 (d, *J* = 8.0 Hz, 2 H); **<sup>13</sup>C NMR (100 MHz, DMSO-*d*<sub>6</sub>) δ (ppm):** 13.24, 34.30, 43.41, 63.81, 103.05, 114.65, 114.86, 119.86, 123.94, 128.86, 129.43, 129.50, 140.58, 142.32, 146.33, 157.71, 159.56, 161.95. **ESIMS:**  $m/z$  368 (M+H)<sup>+</sup>. **IR (KBr):** 3422, 3062, 2921, 1490, 1381, 1212, 1162, 750 cm<sup>-1</sup>; **Elemental analysis** calculated for C<sub>21</sub>H<sub>22</sub>FN<sub>3</sub>O<sub>2</sub>: C, 68.65; H, 6.04; N, 11.44%; found: C, 68.66; H, 6.03; N, 11.42%; **HRMS (ES):** calculated for [M+H] 368.1774; found: 368.1789; **HPLC analysis** by using a Chiralpak IA column (hexane/2-propanol = 80/20, flow rate 1.0 ml/min, T = 25°C, 254 nm); t<sub>1</sub> = 12.35 min, t<sub>2</sub> = 14.22 min.

**4-((Dimethylamino)(4-methoxyphenyl)methyl)-3-methyl-1-phenyl-1H-pyrazol-5-ol (11p)**

**Physical state:** Red solid; **Yield:** 83% (280.0 mg); **Mp:** 123-125 °C; **<sup>1</sup>H NMR (400 MHz, DMSO-*d*<sub>6</sub>) δ (ppm):** 2.17 (s, 3 H), 2.30 (s, 6 H), 3.87 (s, 3 H), 5.13 (s, 1 H), 7.10 (d, *J* = 8.9 Hz, 2 H), 7.17 (t, *J* = 7.3 Hz, 1 H), 7.39 – 7.45 (m, 2 H), 7.71 (s, 1 H), 7.92 (dd, *J* = 8.6 Hz, 1.0 Hz, 1 H), 8.68 (d, *J* = 8.9 Hz, 2 H); **<sup>13</sup>C NMR (100 MHz, DMSO-*d*<sub>6</sub>) δ (ppm):** 13.56, 41.69, 56.15, 101.26, 114.77, 118.77, 124.22, 124.86, 126.64, 129.24, 137.29, 138.85, 148.46, 152.22, 162.30, 164.07. **ESIMS:** *m/z* 338 (M+H)<sup>+</sup>. **IR (KBr):** 3411, 3015, 1589, 1557, 1501, 1432, 1378, 1318, 1264, 1219, 1176, 1147, 763 cm<sup>-1</sup>; **Elemental analysis** calculated for C<sub>20</sub>H<sub>23</sub>N<sub>3</sub>O<sub>2</sub>: C, 71.19; H, 6.87; N, 12.45%; found: C, 71.21; H, 6.88; N, 12.44%; **HRMS (ES):** calculated for [M+H] 338.1868; found: 338.1889; **HPLC analysis** by using a Chiralpak IA column (hexane/2-propanol = 80/20, flow rate 1.0 ml/min, T = 25°C, 254 nm); t<sub>1</sub> = 10.28 min, t<sub>2</sub> = 12.11 min.

**4-((Dibutylamino)(phenyl)methyl)-3-methyl-1-phenyl-1H-pyrazol-5-ol (11q)**

**Physical state:** Pale white solid; **Yield:** 82% (321.0 mg); **Mp:** 141-143 °C; **<sup>1</sup>H NMR (400 MHz, DMSO-*d*<sub>6</sub>) δ (ppm):** 0.89 (t, *J* = 7.3 Hz, 6 H), 1.31 (dq, *J* = 14.9, 7.4 Hz, 4 H), 1.50 - 1.59 (m, 4 H), 2.17 (s, 3 H), 2.84 (t, *J* = 7.9 Hz, 4 H), 4.64 (s, 1 H), 7.02 - 7.09 (m, 2 H), 7.18 - 7.22 (m, 1 H), 7.29 - 7.34 (m, 3 H), 7.39 (d, *J* = 7.4 Hz, 1 H), 7.95 (dd, *J* = 8.6, 1.0 Hz, 3 H); **<sup>13</sup>C NMR (100 MHz, DMSO-*d*<sub>6</sub>) δ (ppm):** 13.54, 13.93, 19.74, 28.03, 35.36, 46.98, 102.49, 119.52, 123.33, 125.31, 127.80, 128.12, 128.70, 129.33, 141.26, 146.32, 147.23, 157.75. **ESIMS:** *m/z* 392 (M+H)<sup>+</sup>. **IR (KBr):** 3407, 3016, 2924, 1594, 1392, 1213, 1164, 754 cm<sup>-1</sup>; **Elemental analysis** calculated for C<sub>25</sub>H<sub>33</sub>N<sub>3</sub>O: C, 76.69; H, 8.50; N, 10.73%; found: C, 76.71; H, 8.48; N, 10.74%; **HRMS (ES):** calculated for [M+H] 392.2702; found: 392.2707; **HPLC analysis** by using a Chiralpak IA column (hexane/2-propanol = 80/20, flow rate 1.0 ml/min, T = 25°C, 254 nm); t<sub>1</sub> = 12.47 min, t<sub>2</sub> = 14.37 min.

**4-((2-Chlorophenyl)(dibutylamino)methyl)-3-methyl-1-phenyl-1H-pyrazol-5-ol (11r)**

**Physical state:** Brown solid; **Yield:** 83% (353.5 mg); **Mp:** 138-140 °C; **<sup>1</sup>H NMR (400 MHz, DMSO-*d*<sub>6</sub>) δ (ppm):** 0.89 (t, *J* = 7.3 Hz, 6 H), 1.30 (dq, *J* = 14.9, 7.3 Hz, 4 H), 1.47 - 1.57 (m, 4 H), 2.23 (s, 3 H), 2.82 (t, *J* = 7.8 Hz, 4 H), 5.09 (s, 1 H), 7.06 - 7.16 (m, 2 H), 7.32 - 7.37 (m, 4 H), 7.95 - 7.97 (m, 2 H), 8.16 (dd, *J* = 7.8, 1.2 Hz, 1 H); **<sup>13</sup>C NMR (100 MHz, DMSO-*d*<sub>6</sub>) δ (ppm):** 13.67, 13.90, 19.70, 28.01, 32.73, 47.05, 102.06, 119.75, 123.66, 127.00, 127.34, 128.77, 129.23, 131.45, 131.60, 140.92, 143.74, 146.16, 158.14. **ESIMS:**

$m/z$  426 (M+H)<sup>+</sup>. **IR (KBr)**: 3406, 3019, 2963, 1596, 1499, 1384, 1216, 1115, 762, 669 cm<sup>-1</sup>; **Elemental analysis** calculated for C<sub>25</sub>H<sub>32</sub>ClN<sub>3</sub>O: C, 70.49; H, 7.57; N, 9.86%; found: C, 70.51; H, 7.54; N, 9.87%; **HRMS (ES)**: calculated for [M+H] 426.2312; found: 426.2333; **HPLC analysis** by using a Chiralpak IA column (hexane/2-propanol = 80/20, flow rate 1.0 ml/min, T = 25°C, 254 nm); t<sub>1</sub> = 12.25 min, t<sub>2</sub> = 14.12 min.

#### **4,4'-(Phenylmethylene)bis(3-methyl-1-phenyl-1H-pyrazol-5-ol) (12)**

**Physical state**: White solid; **Mp**: 170-172 °C; **<sup>1</sup>H NMR (400 MHz, DMSO-*d*<sub>6</sub>) δ (ppm)**: 2.33 (s, 6 H), 4.97 (s, 1 H), 7.18 (dq, *J* = 8.4, 4.1 Hz, 1 H), 7.23 - 7.30 (m, 6 H), 7.45 (t, *J* = 7.8 Hz, 4 H), 7.72 (d, *J* = 7.9 Hz, 4 H), 12.47 (s., 1 H); 14.02 (s., 1 H); **<sup>13</sup>C NMR (100 MHz, DMSO-*d*<sub>6</sub>) δ (ppm)**: 11.60, 33.14, 120.51, 125.53, 125.86, 127.14, 128.10, 128.88, 137.32, 142.25, 146.27; **ESIMS**:  $m/z$  437 (M+H)<sup>+</sup>. **IR (KBr)**: 3361, 2927, 1625, 1574, 1286, 1189, 1126, 1027, 792 cm<sup>-1</sup>; **Elemental analysis** calculated for C<sub>27</sub>H<sub>24</sub>N<sub>4</sub>O<sub>2</sub>: C, 74.29; H, 5.54; N, 12.84. Found: C, 74.32; H, 5.56; N, 12.86; **HRMS (ES)**: calculated for [M+H] 437.1967; found: 436.1946.

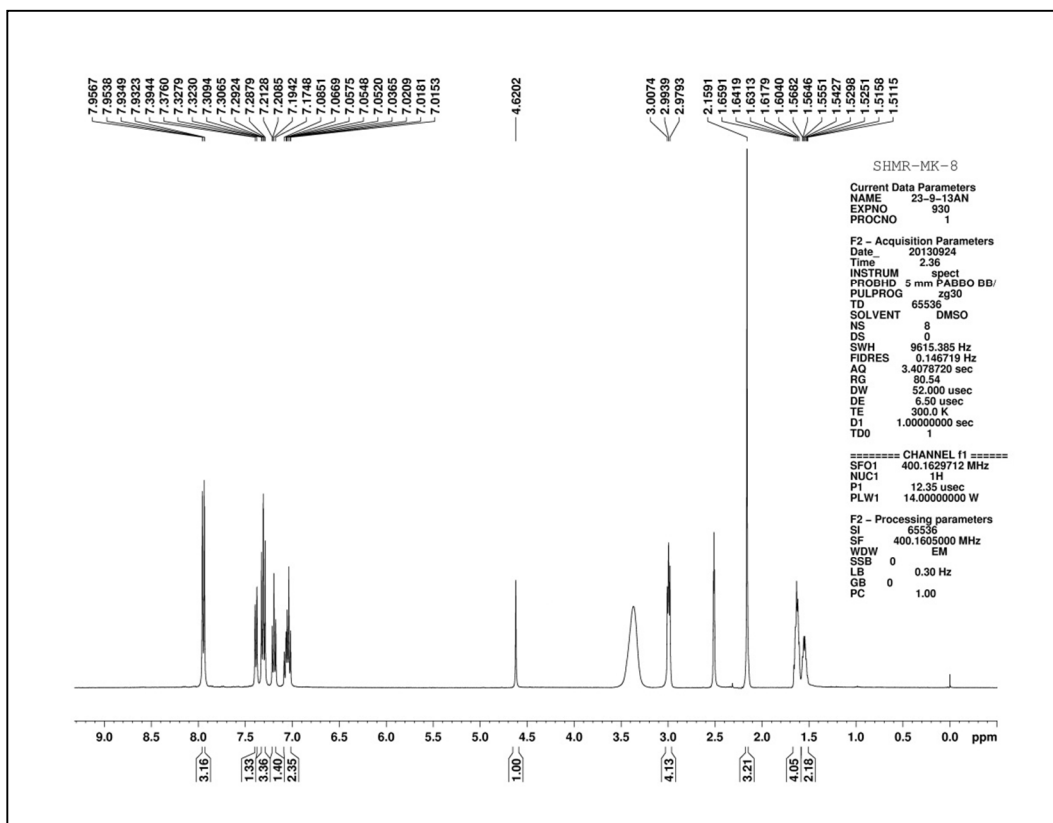

<sup>1</sup>H Spectra of 11a

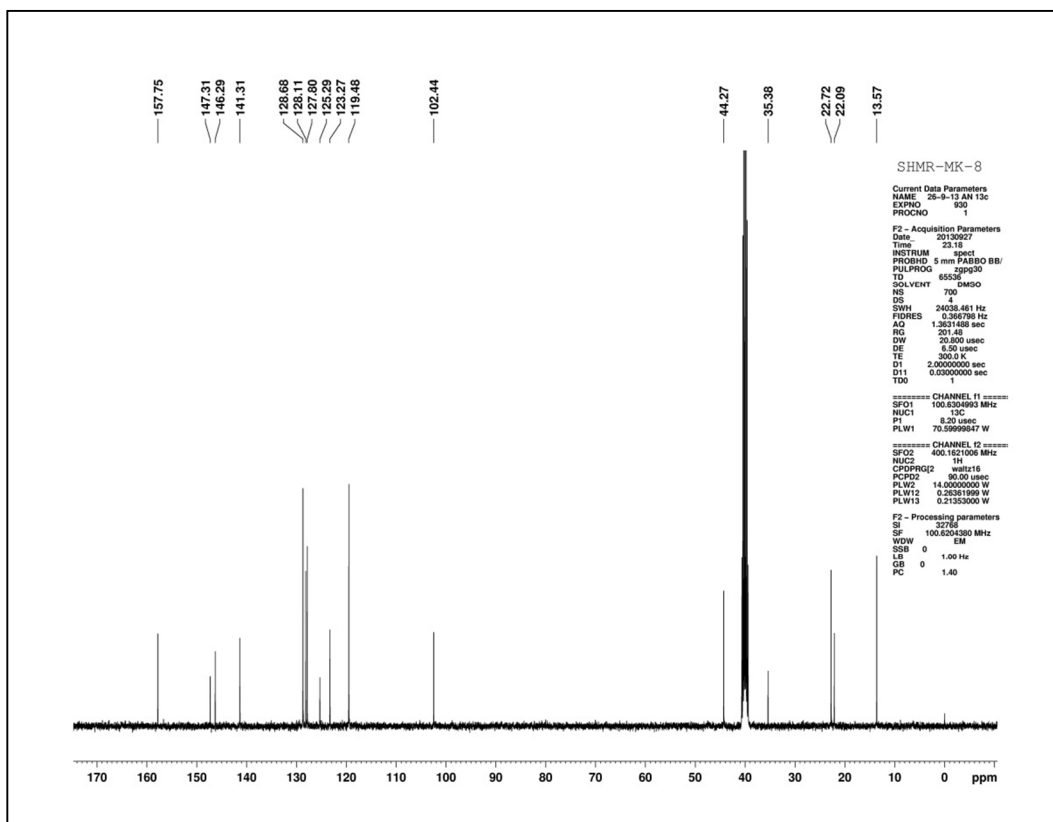

<sup>13</sup>C Spectra of 11a

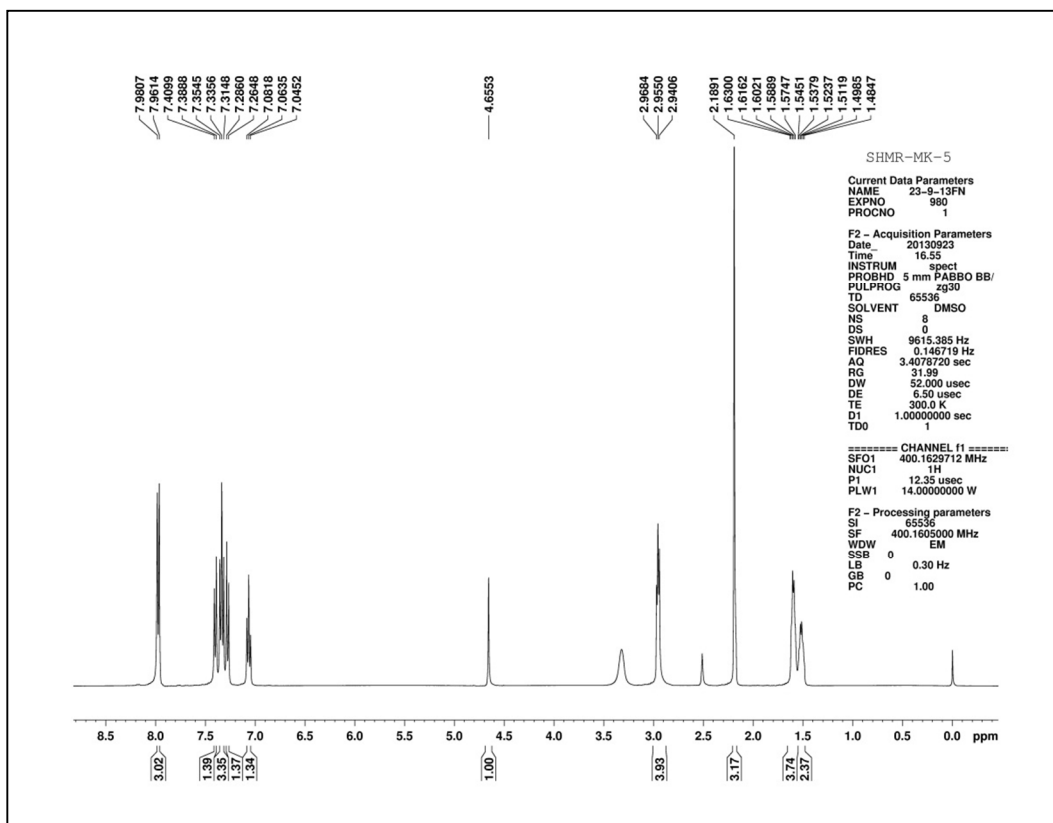

<sup>1</sup>H Spectra of 11b

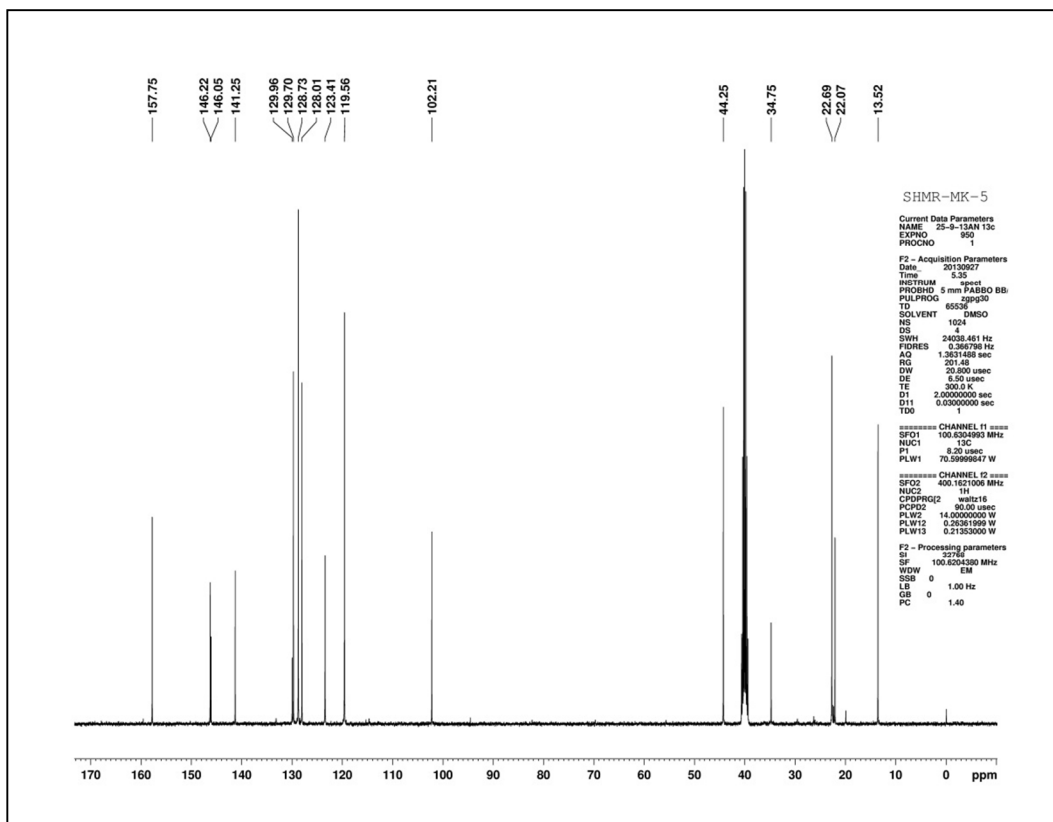

<sup>13</sup>C Spectra of 11b



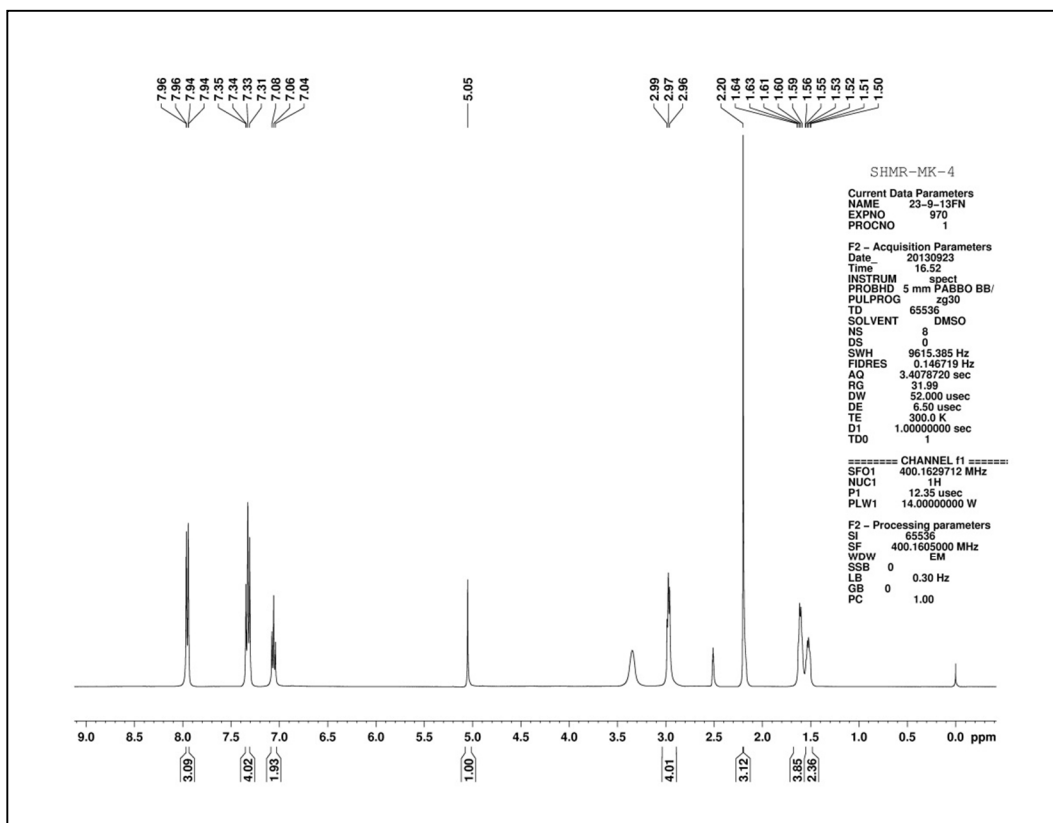

<sup>1</sup>H Spectra of 11c

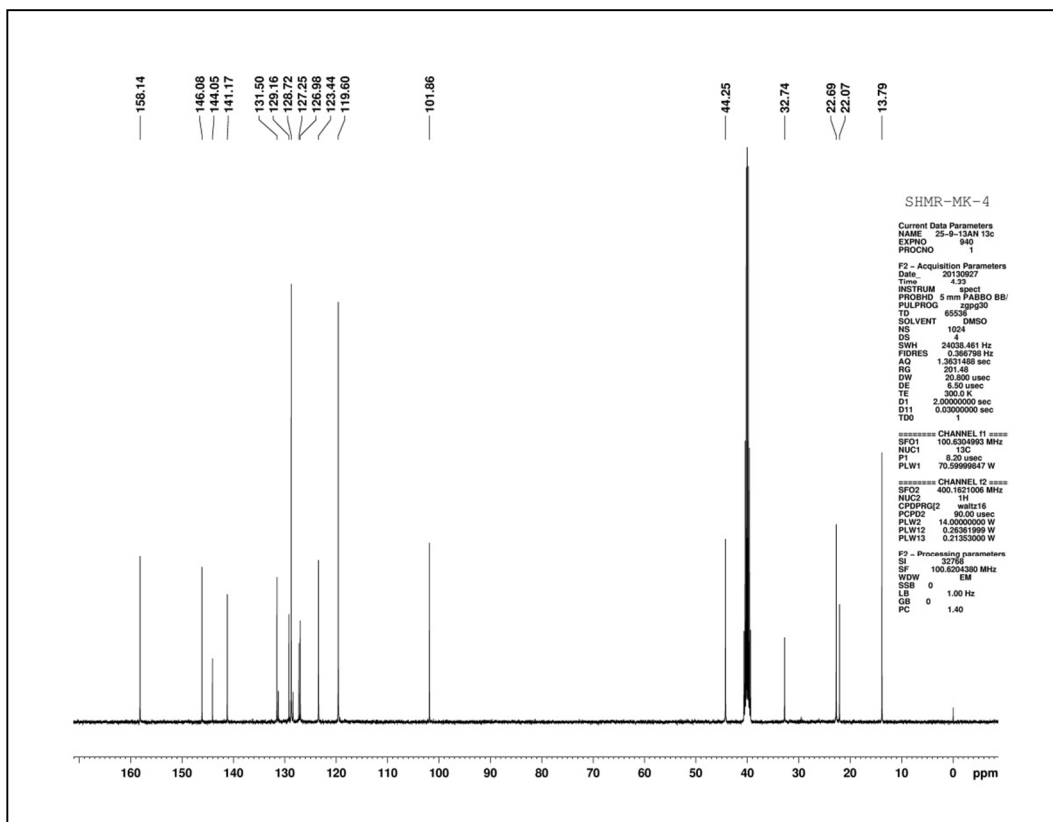

<sup>13</sup>C Spectra of 11c

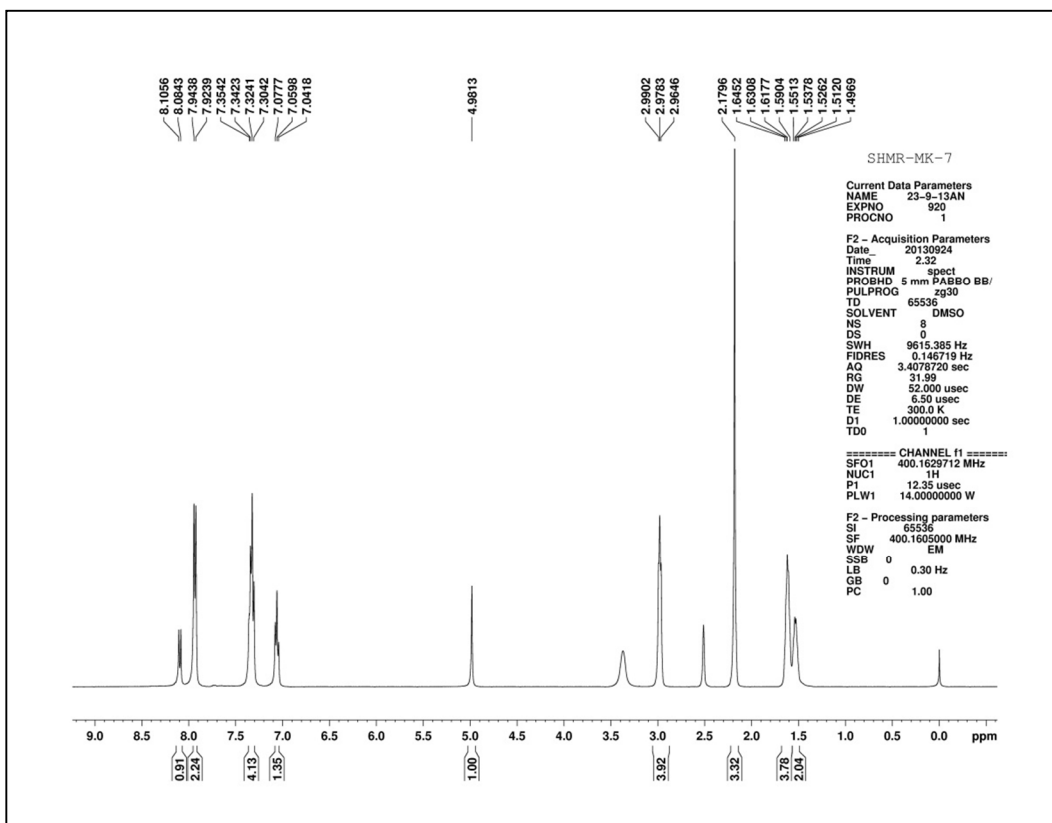

<sup>1</sup>H Spectra of 11d

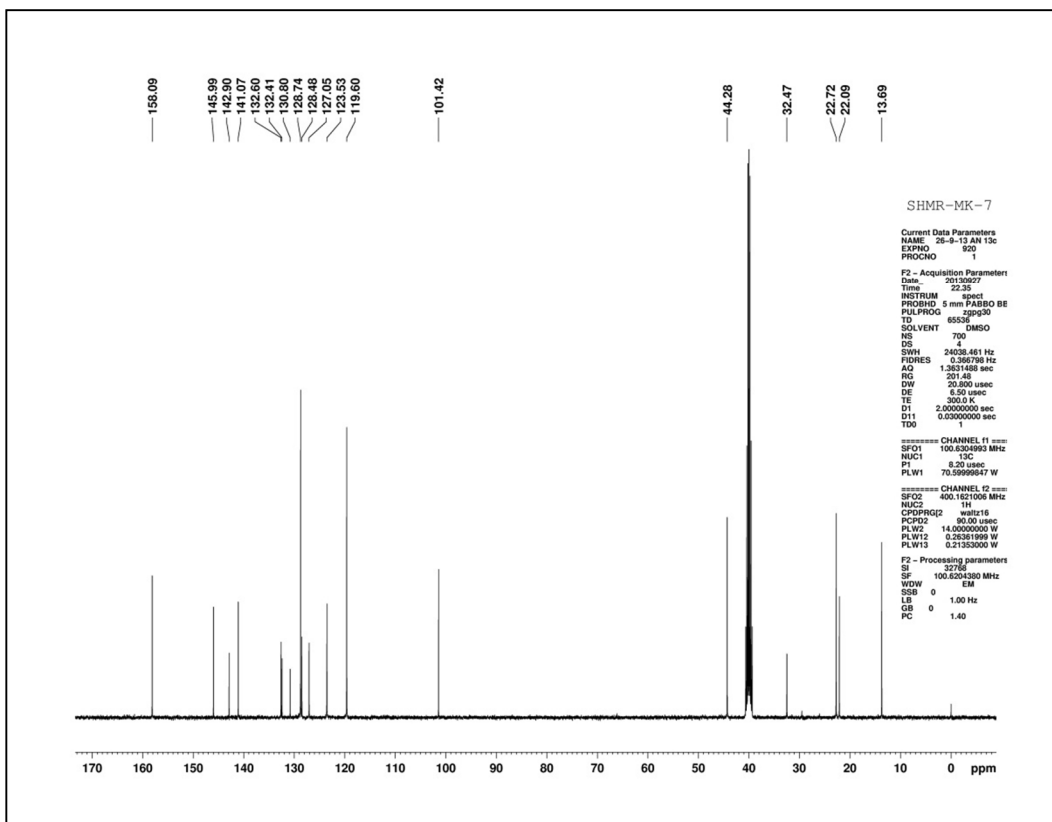

<sup>13</sup>C Spectra of 11d

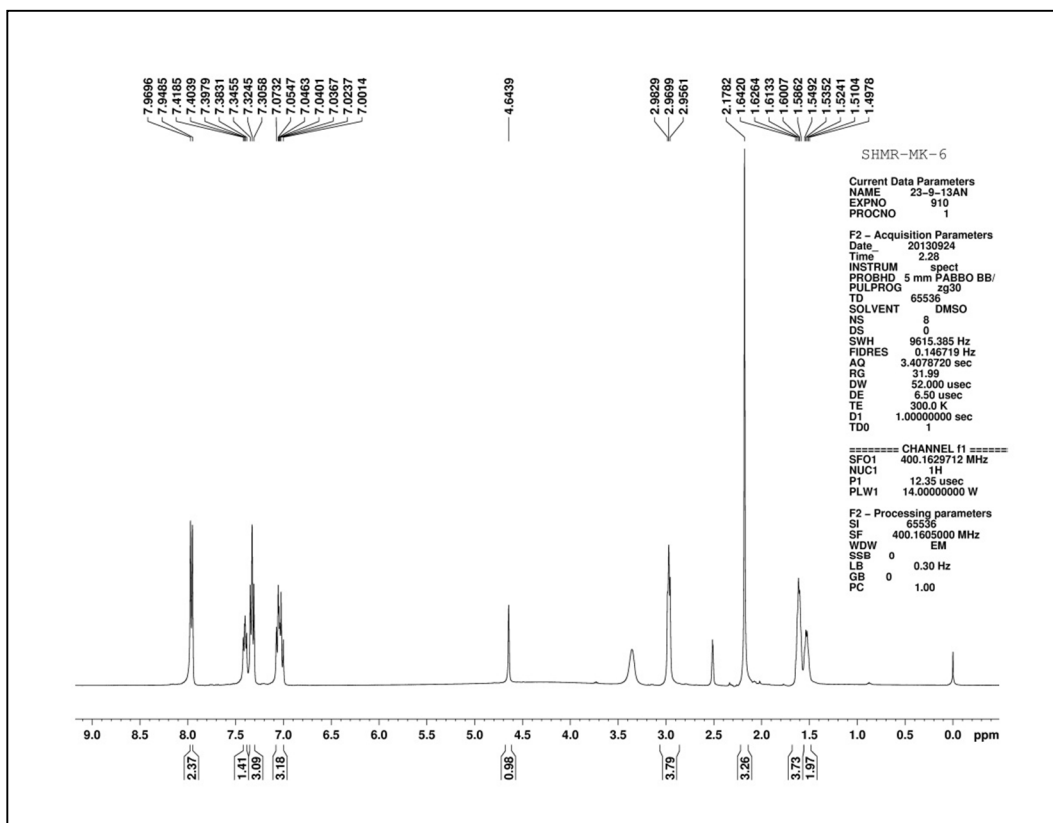

<sup>1</sup>H Spectra of 11e

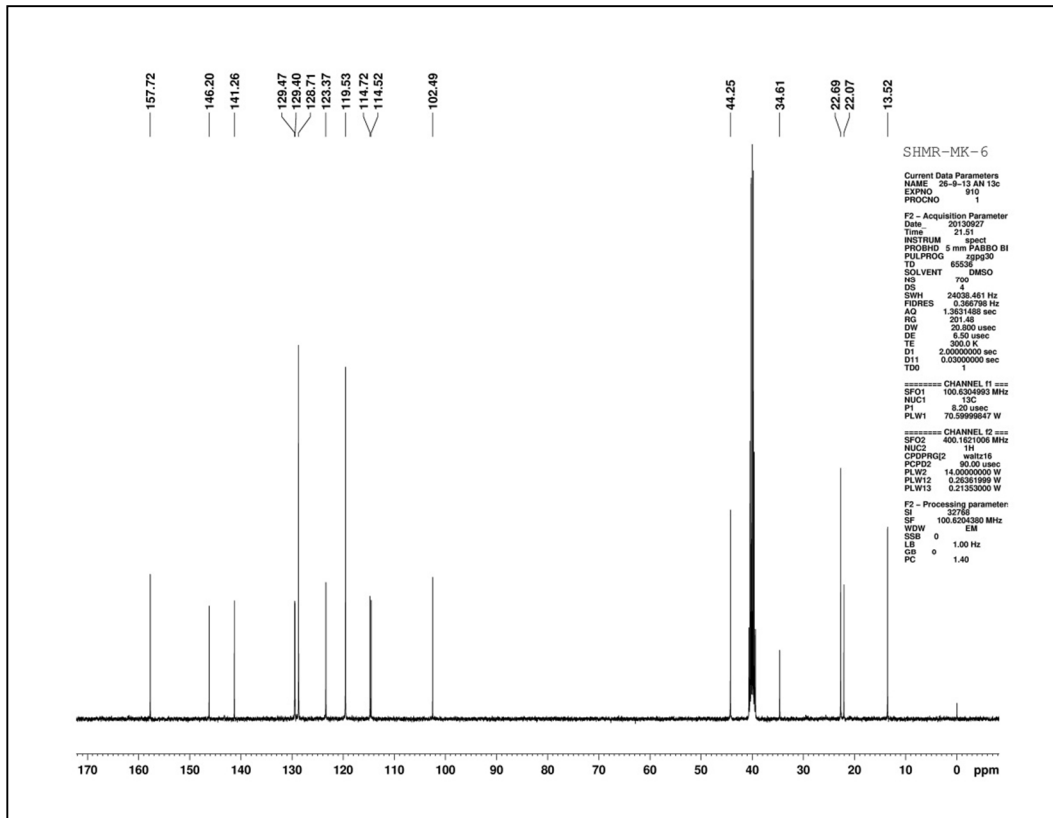

<sup>13</sup>C Spectra of 11e

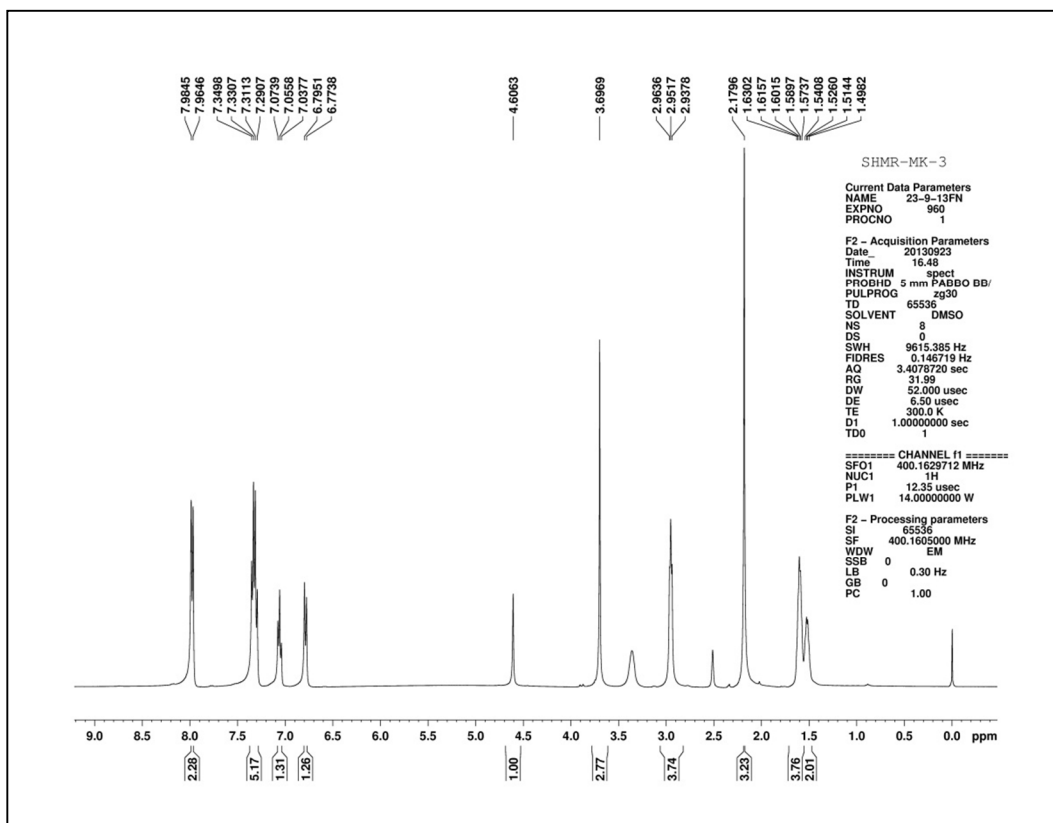

<sup>1</sup>H Spectra of 11f

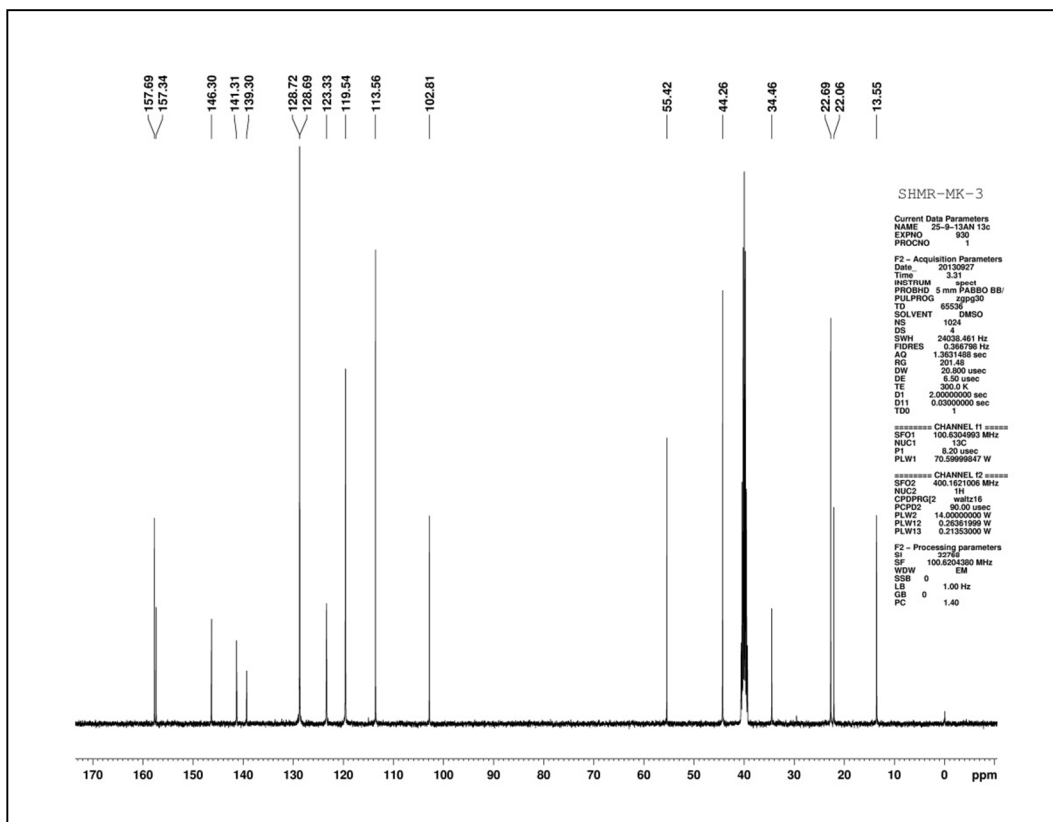

<sup>13</sup>C Spectra of 11f

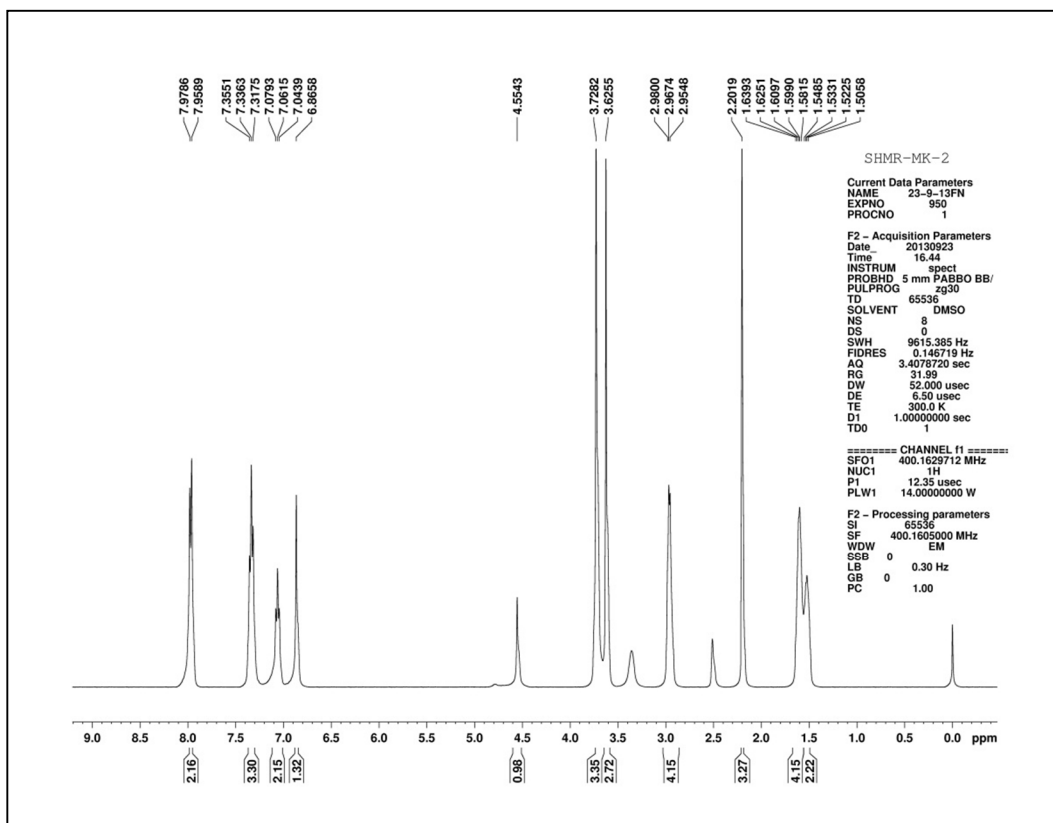

<sup>1</sup>H Spectra of 11g

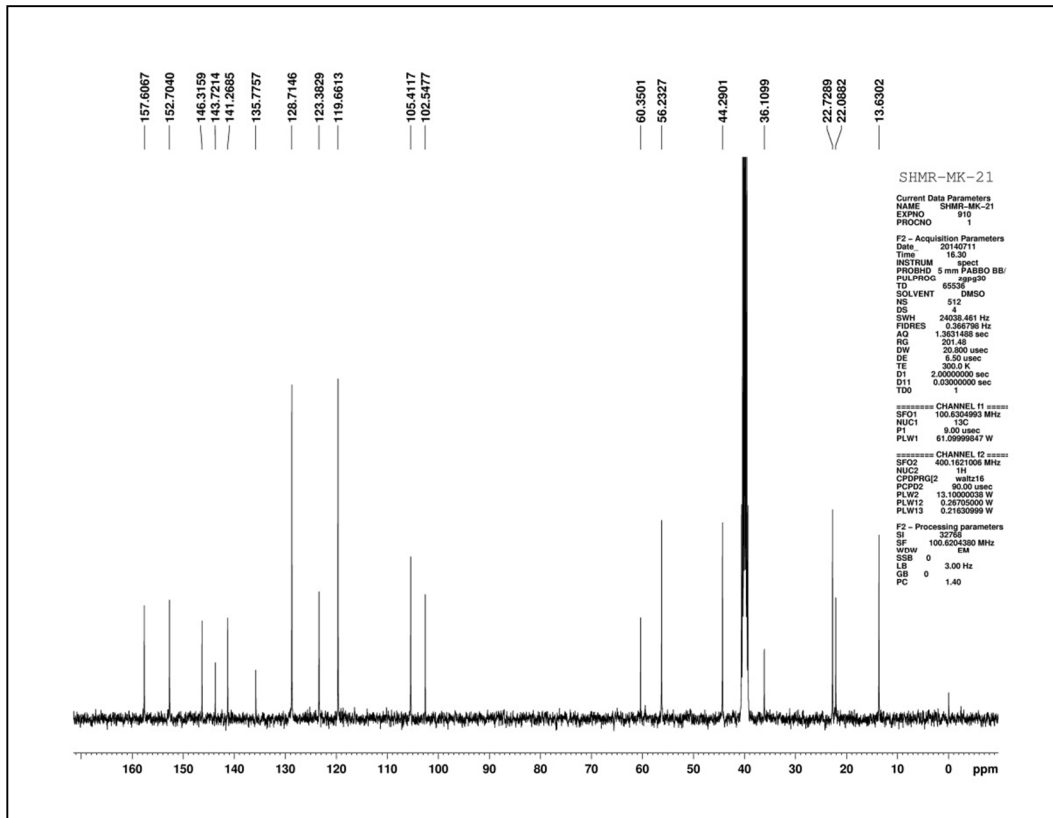

<sup>13</sup>C Spectra of 11g

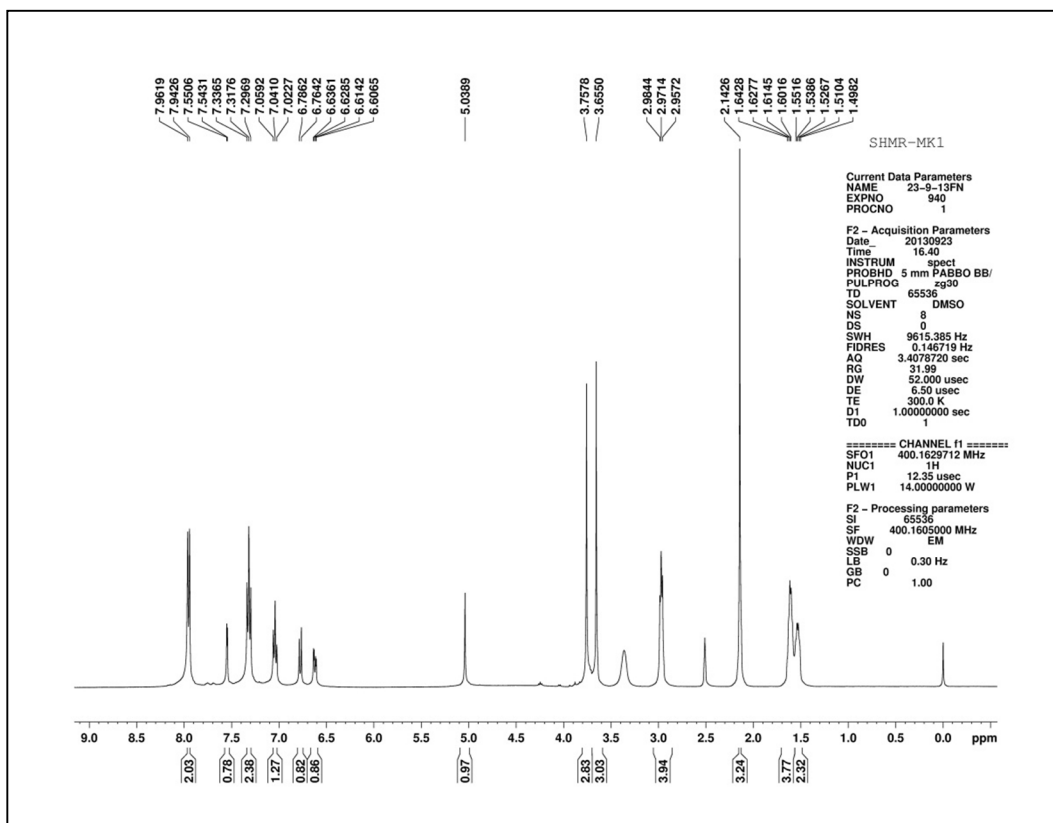

<sup>1</sup>H Spectra of 11h

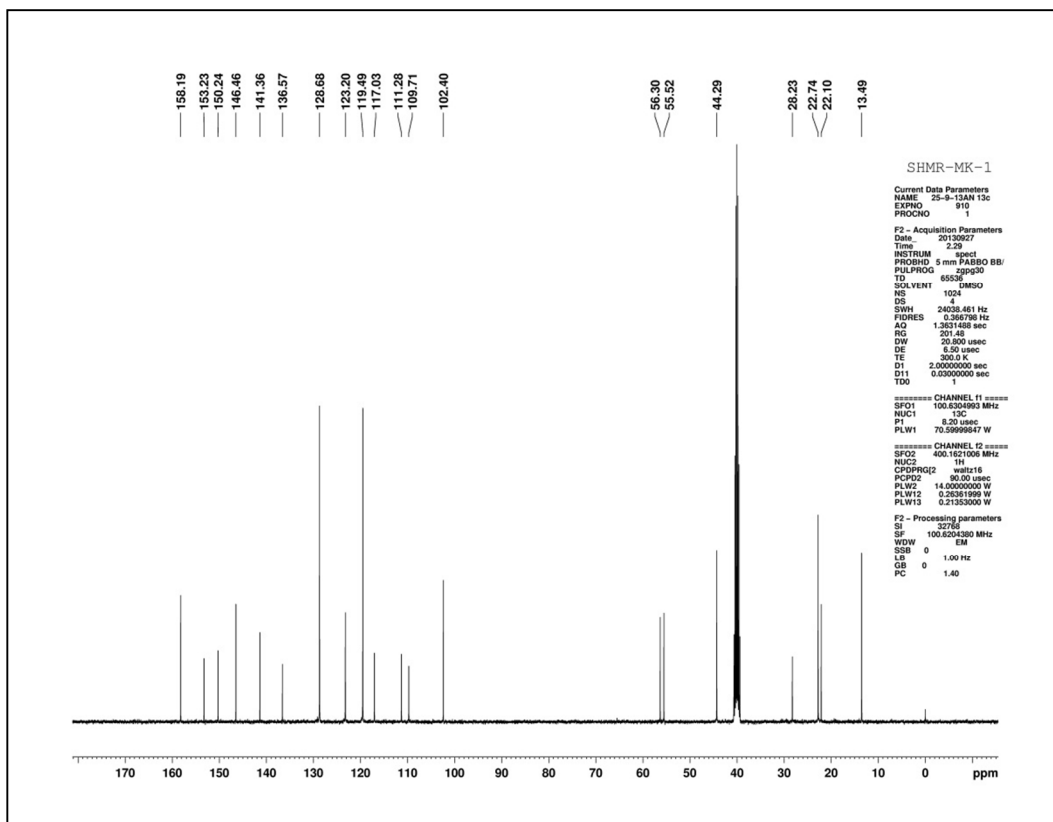

<sup>13</sup>C Spectra of 11h

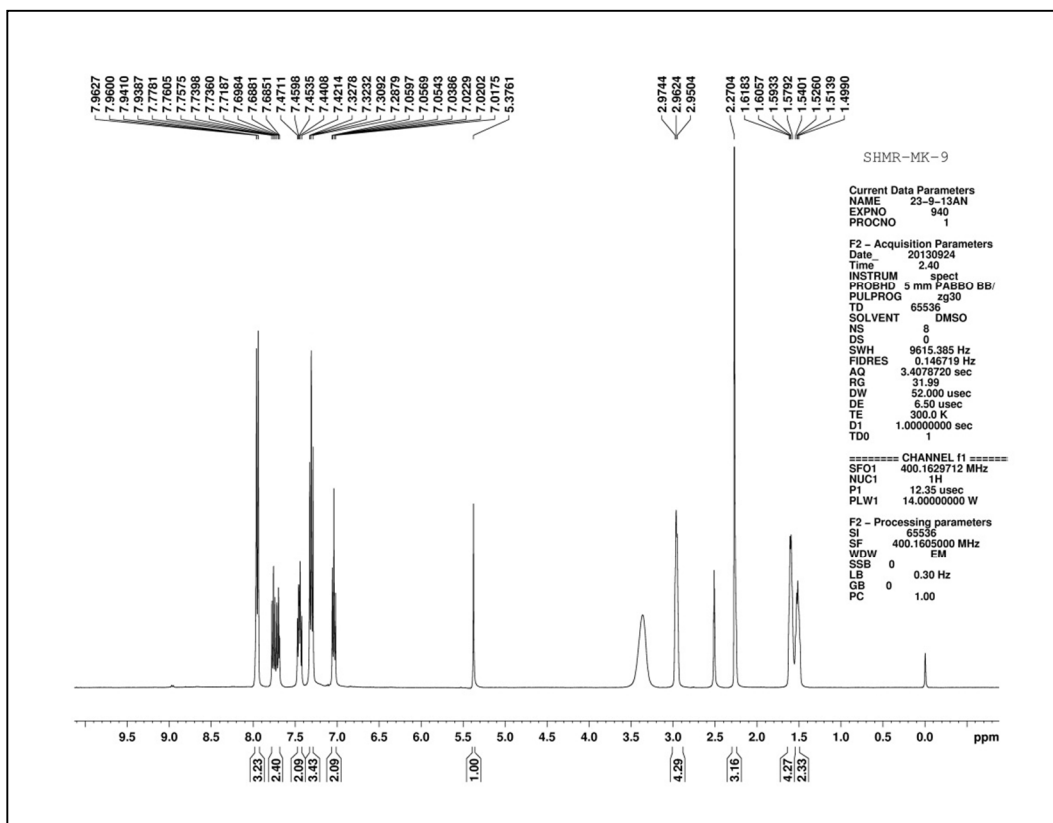

<sup>1</sup>H Spectra of 11i

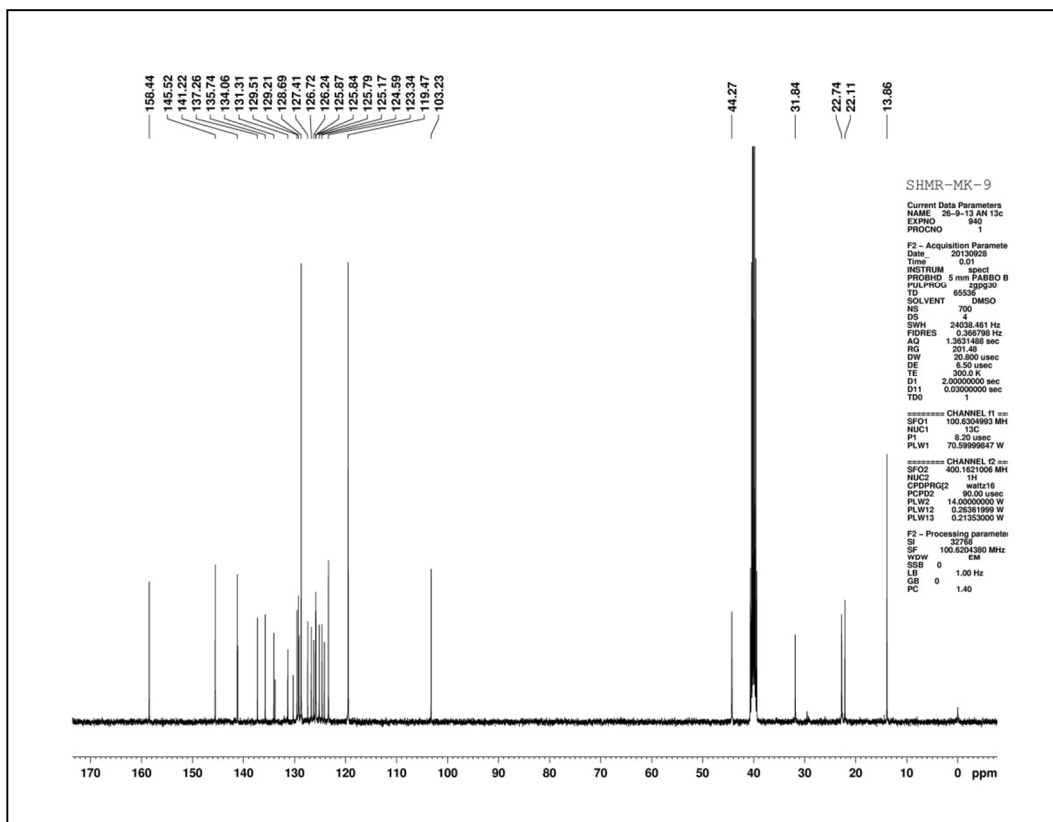

<sup>13</sup>C Spectra of 11i

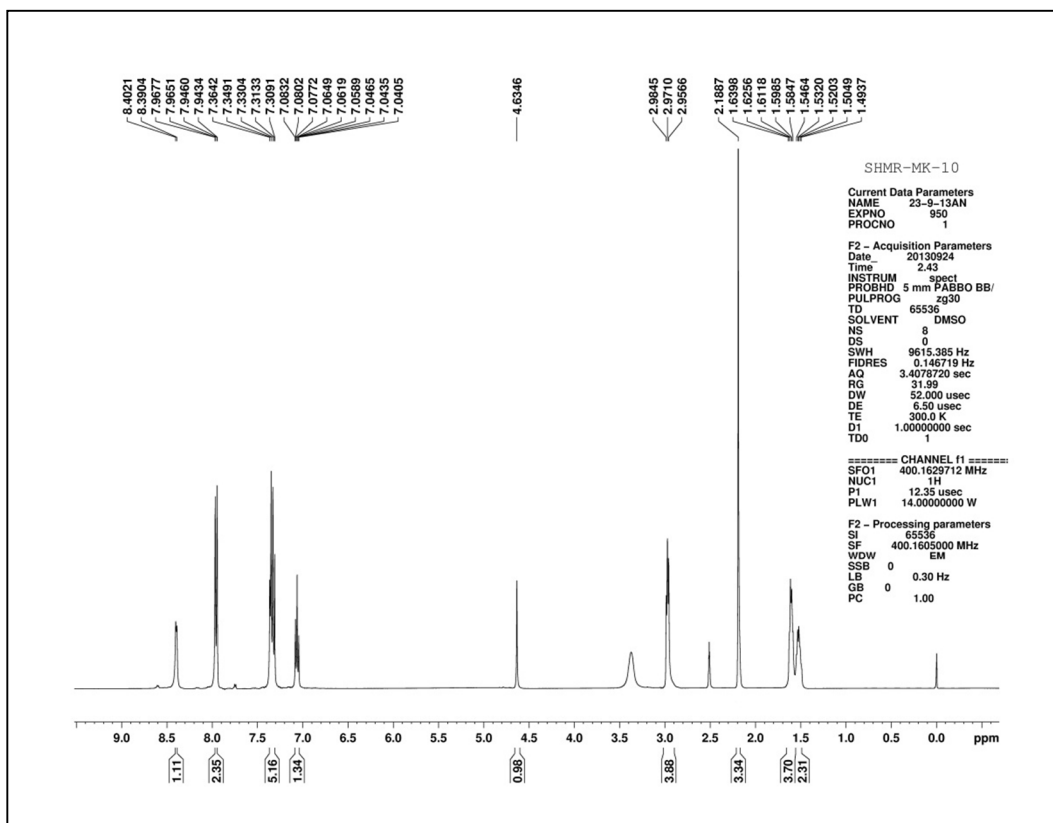

<sup>1</sup>H Spectra of 11j

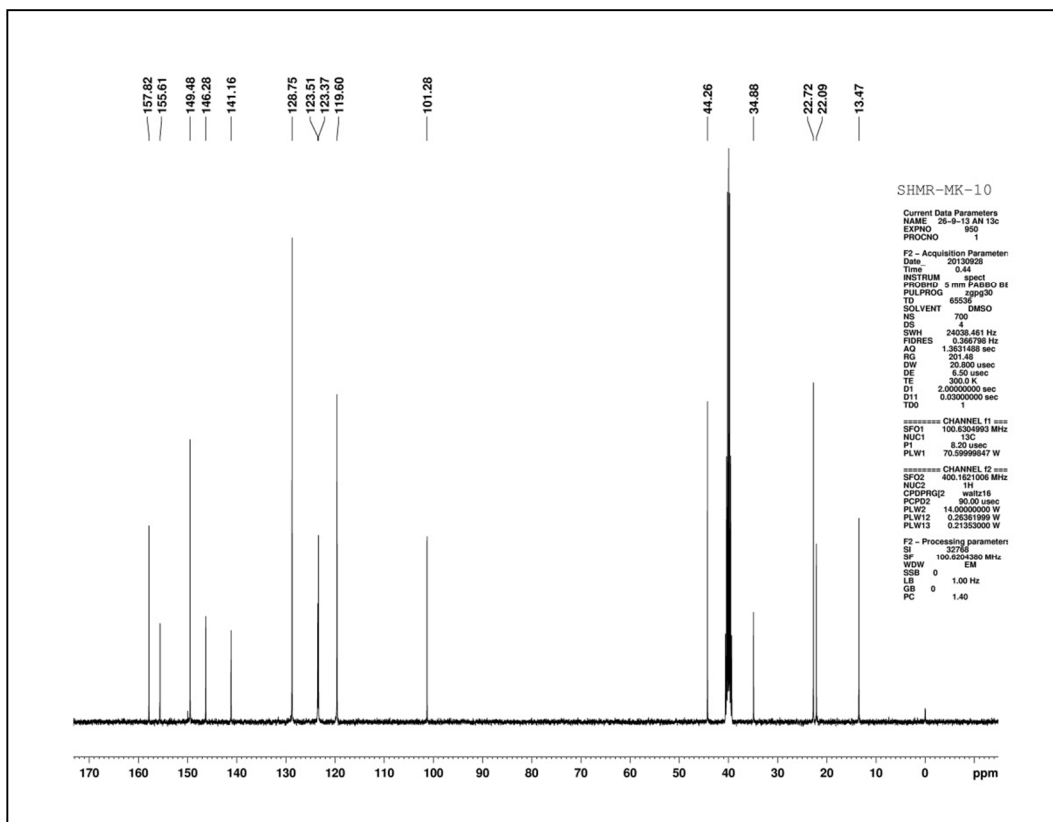

<sup>13</sup>C Spectra of 11j



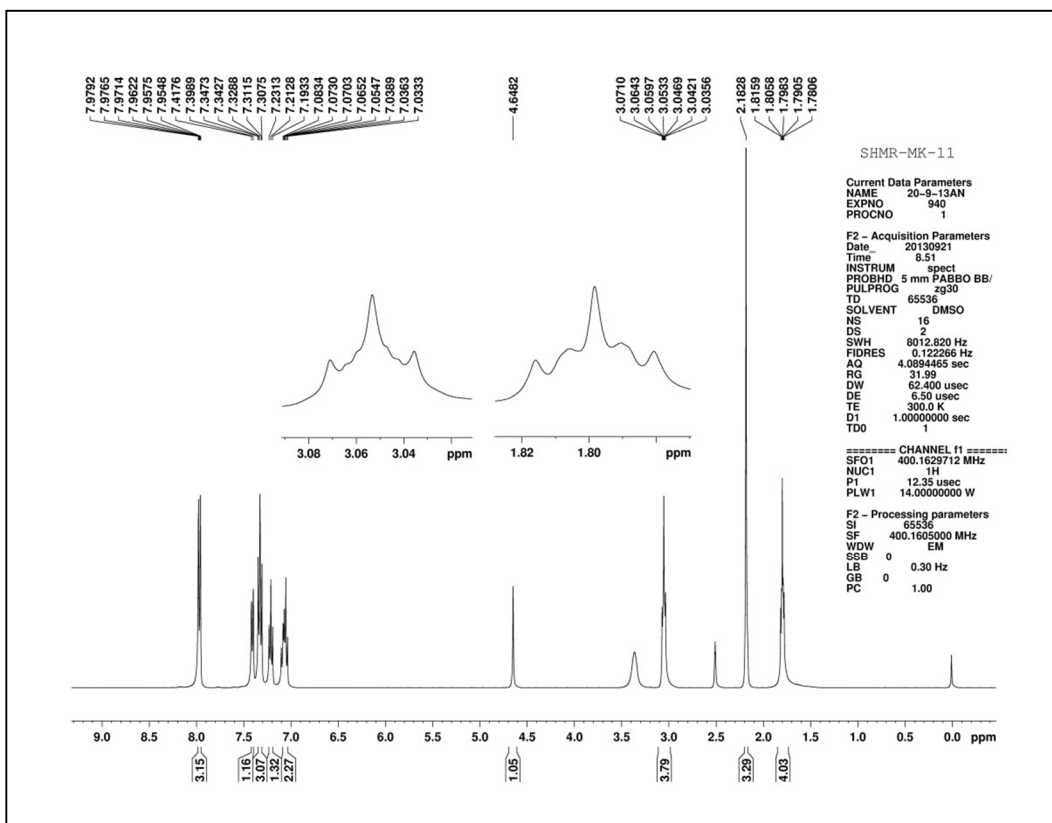

<sup>1</sup>H Spectra of 11k

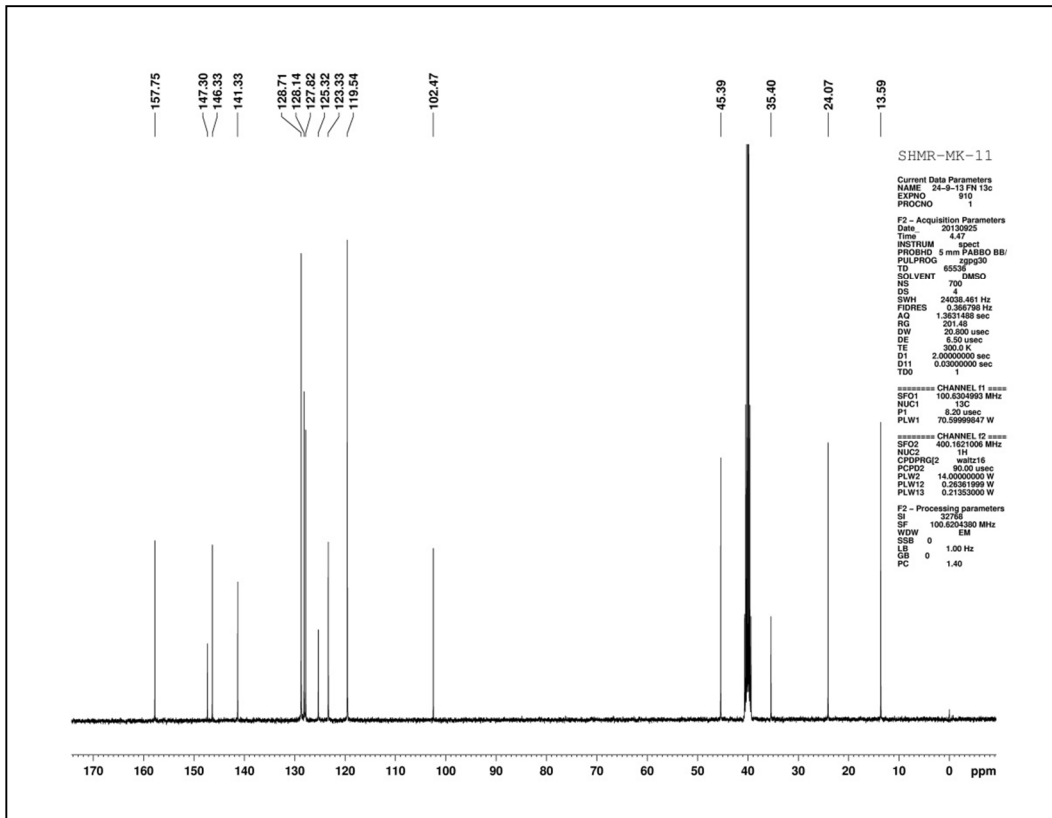

<sup>13</sup>C Spectra of 11k

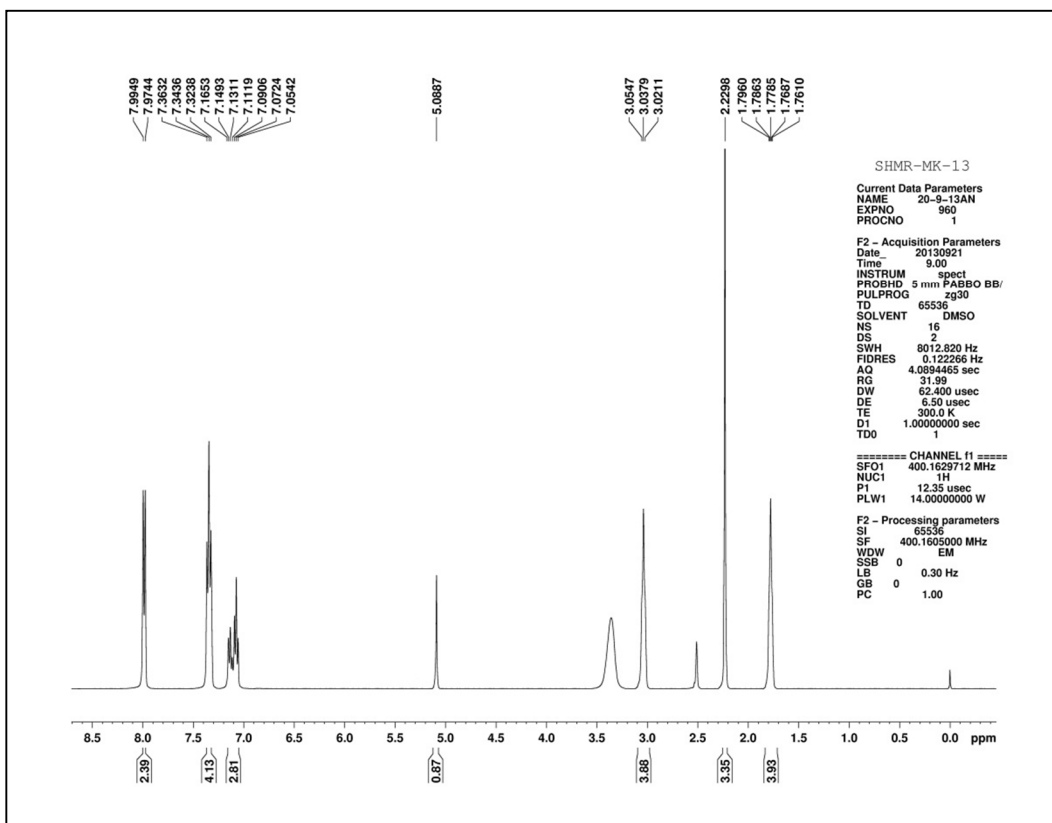

<sup>1</sup>H Spectra of 111

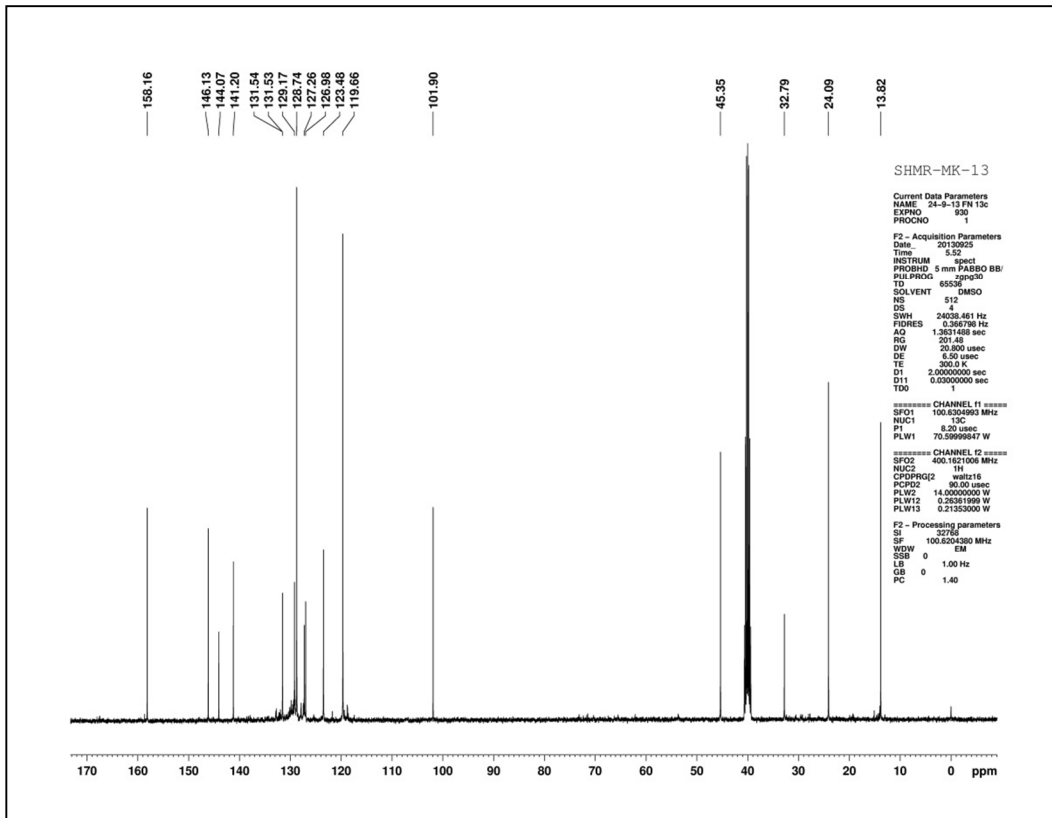

<sup>13</sup>C Spectra of 111

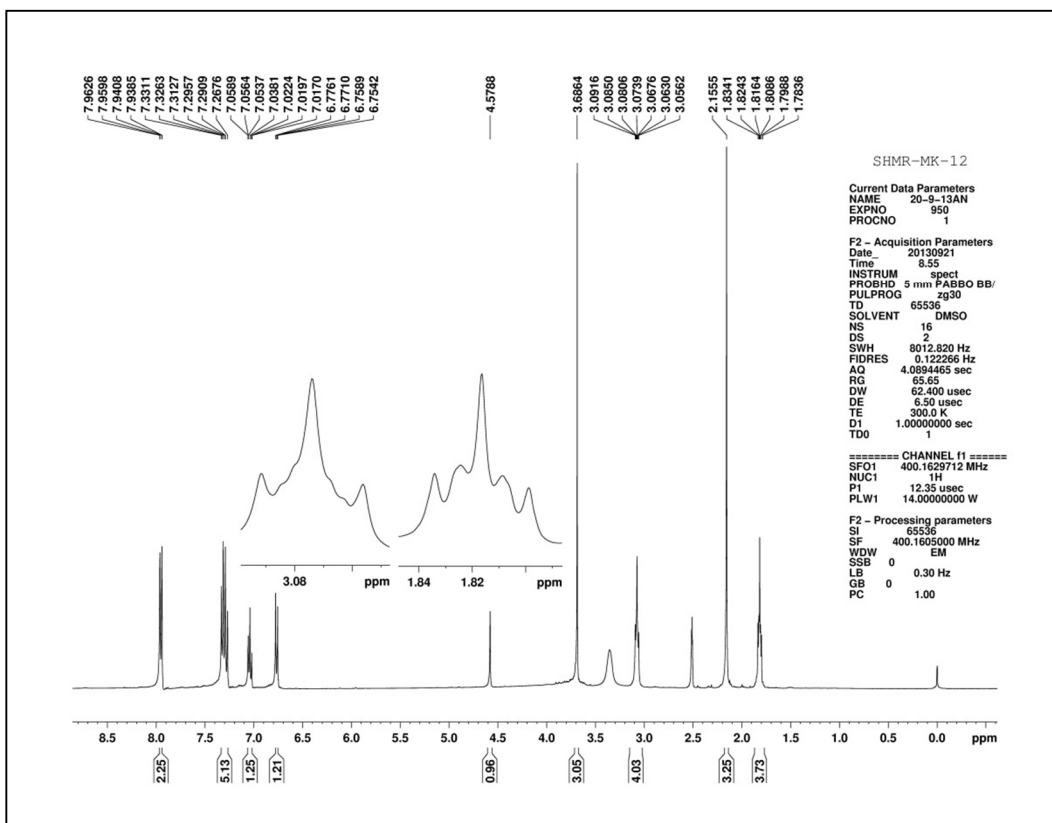

<sup>1</sup>H Spectra of 11m

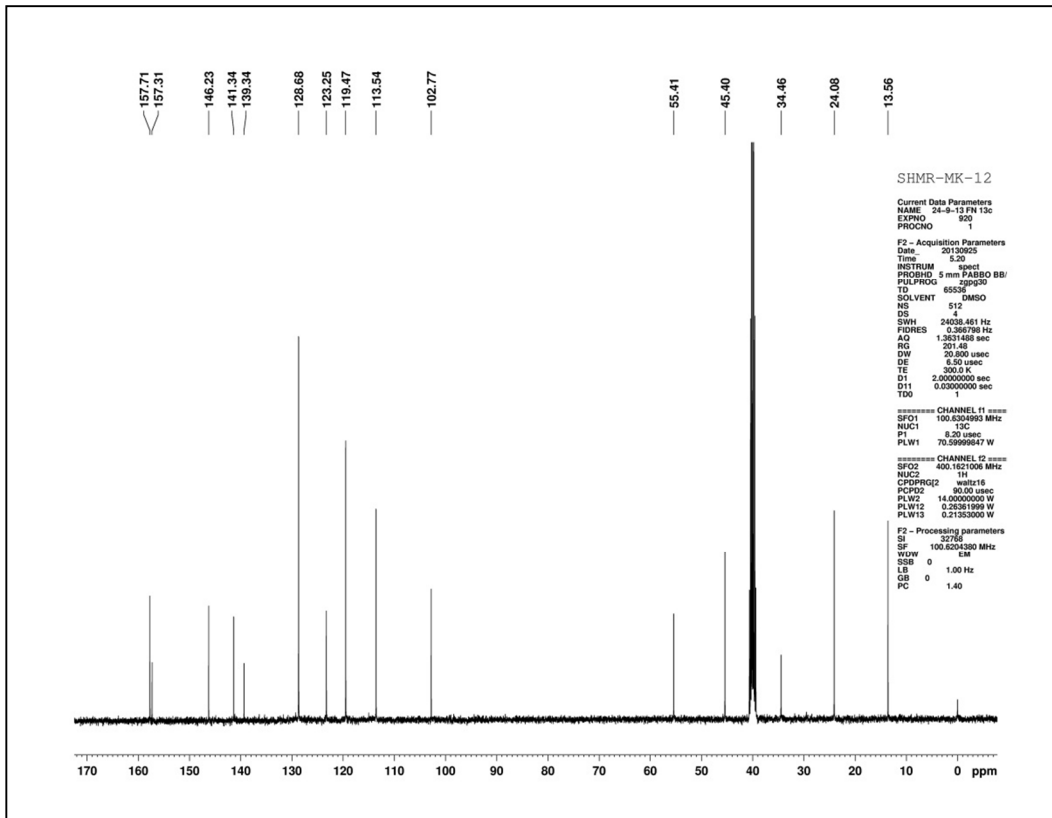

<sup>13</sup>C Spectra of 11m

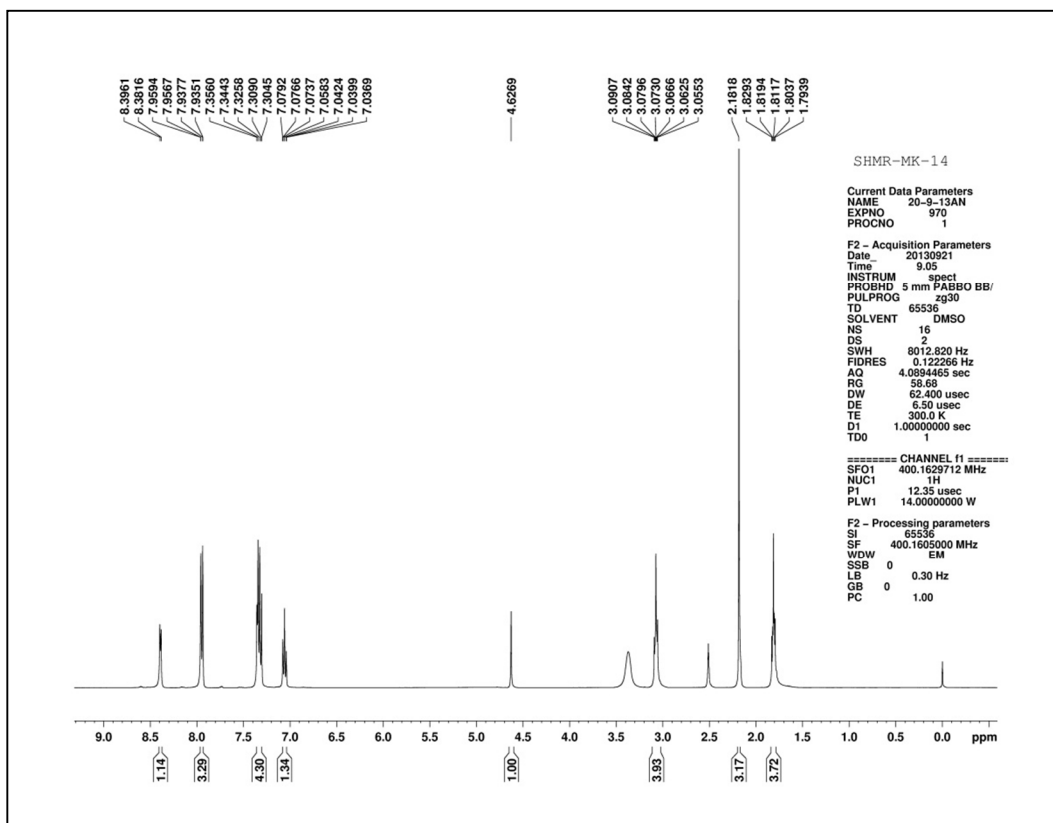

### <sup>1</sup>H Spectra of 11n

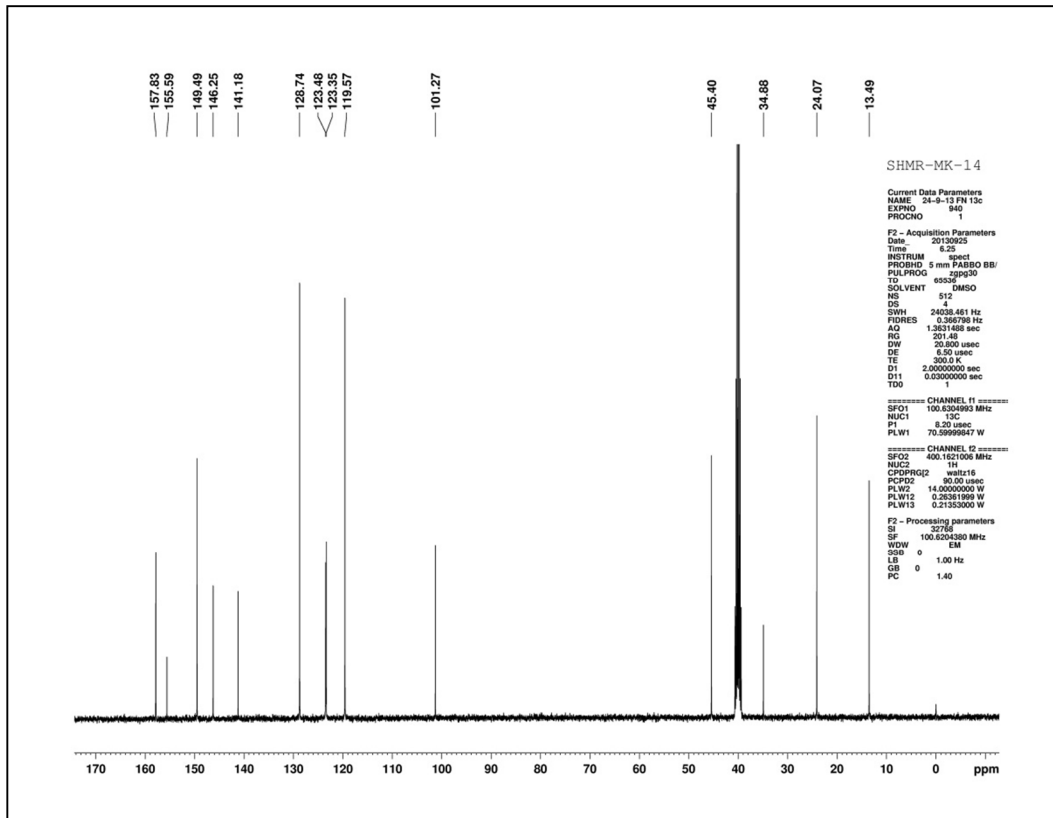

### <sup>13</sup>C Spectra of 11n

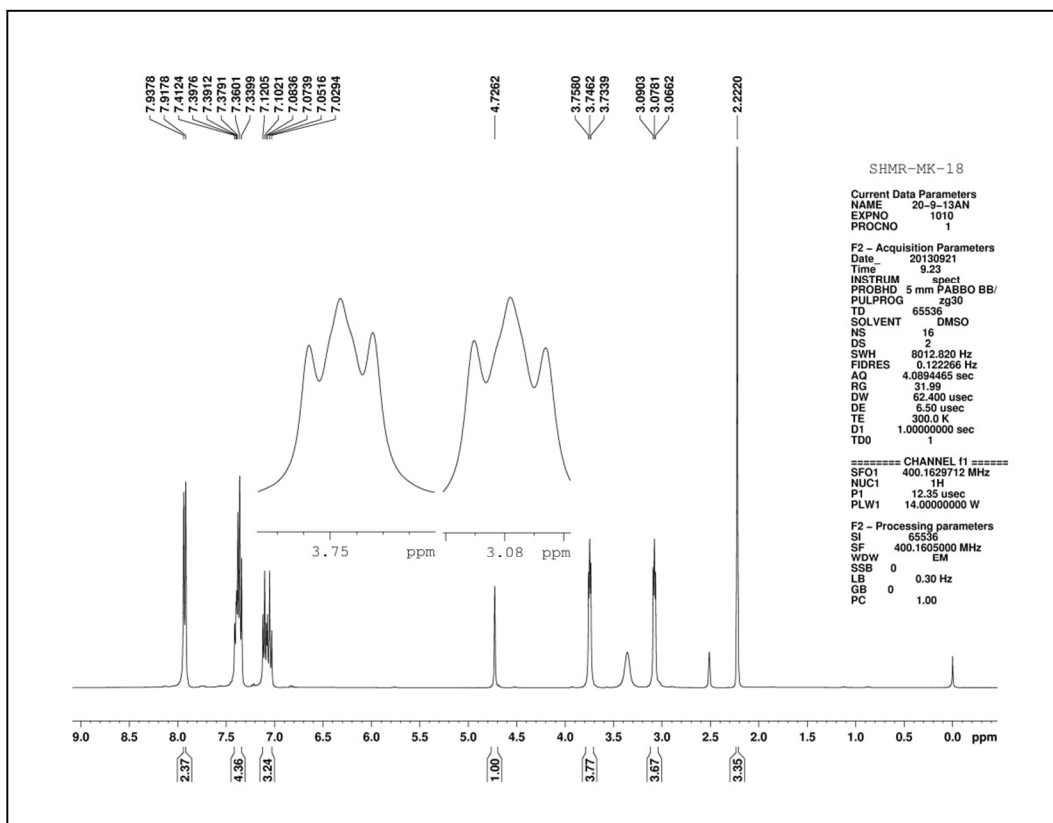

<sup>1</sup>H Spectra of 11o

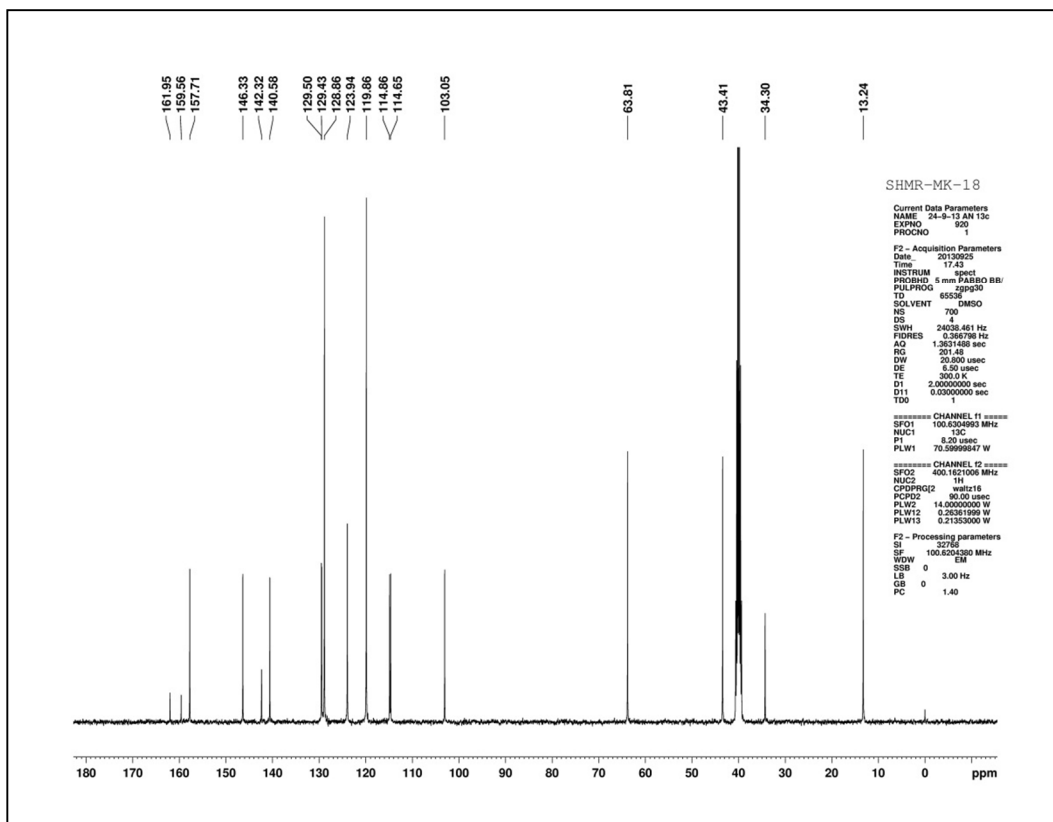

<sup>13</sup>C Spectra of 11o

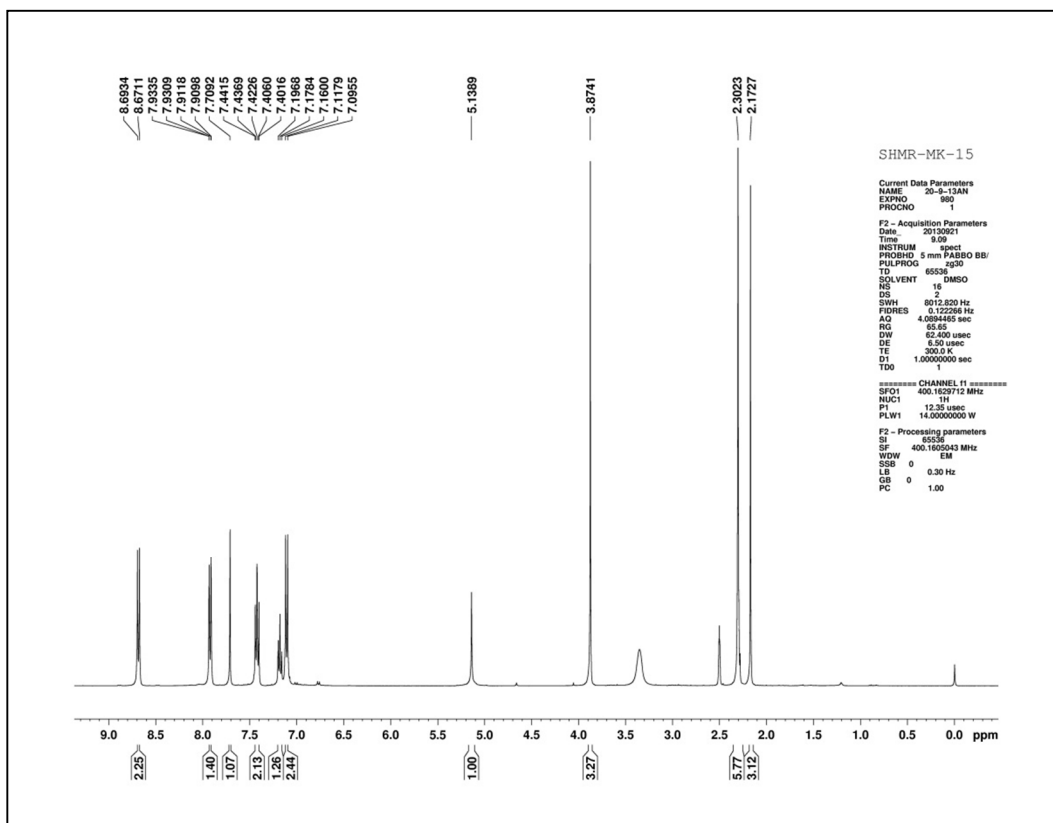

<sup>1</sup>H Spectra of 11p

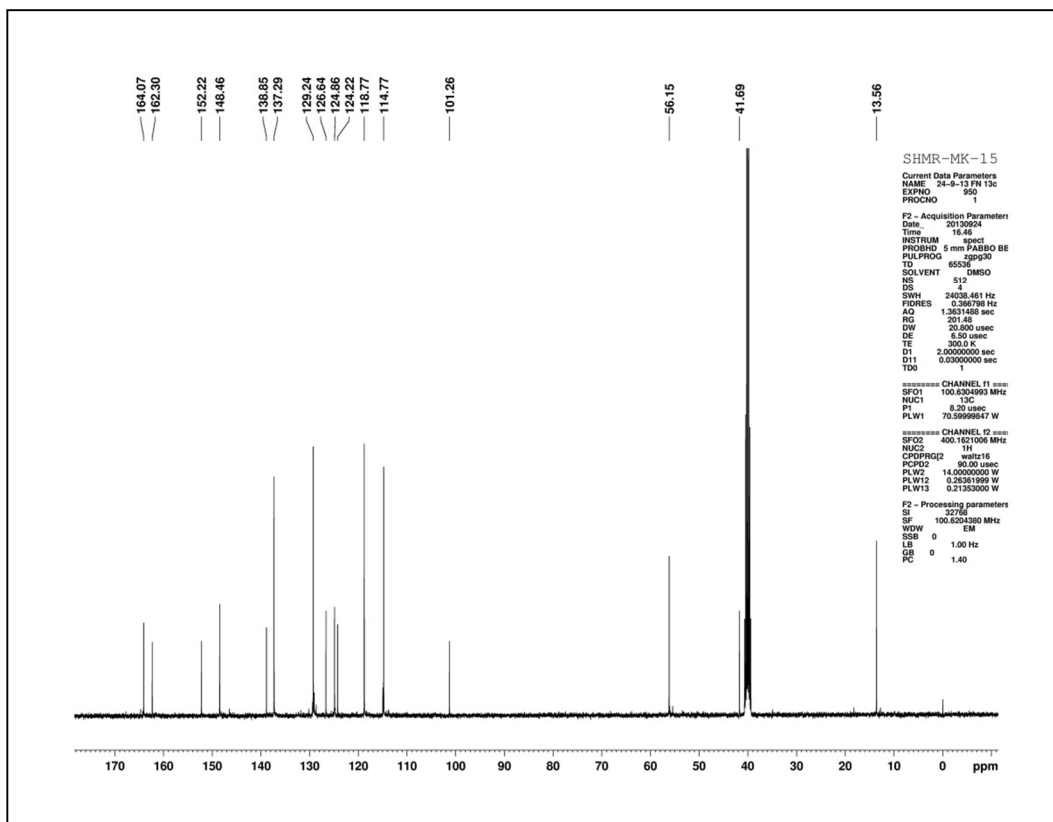

<sup>13</sup>C Spectra of 11p

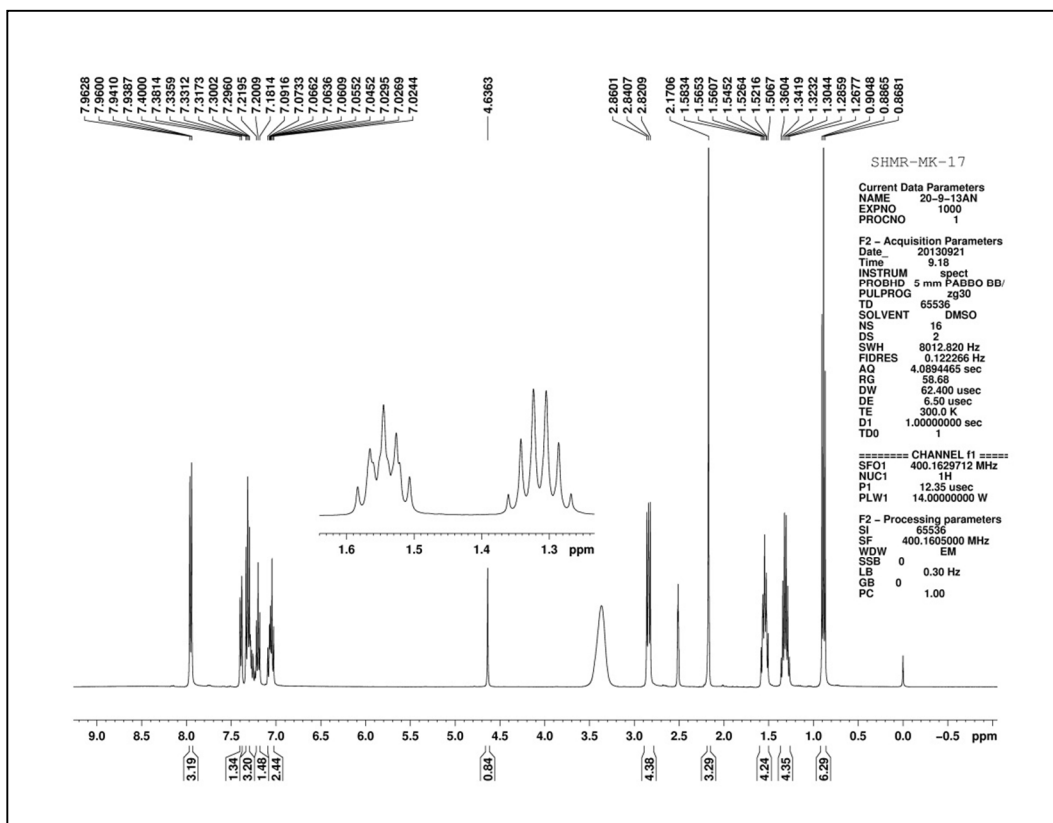

<sup>1</sup>H Spectra of 11q

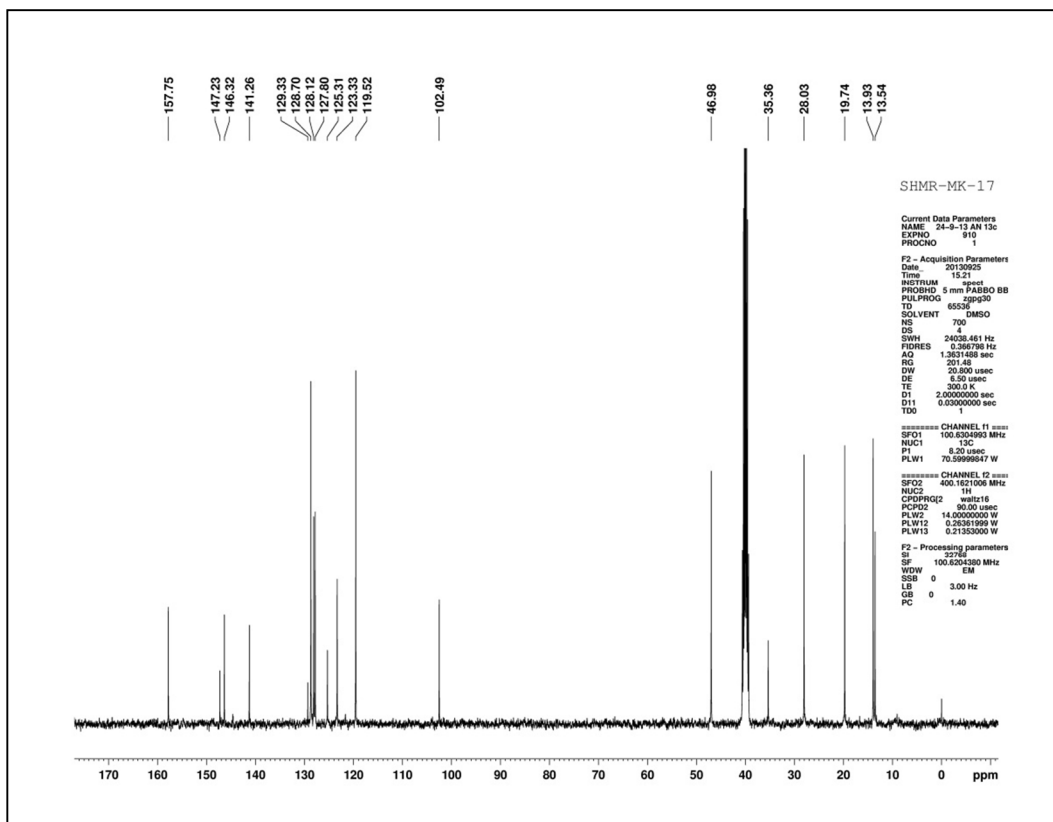

<sup>13</sup>C Spectra of 11q

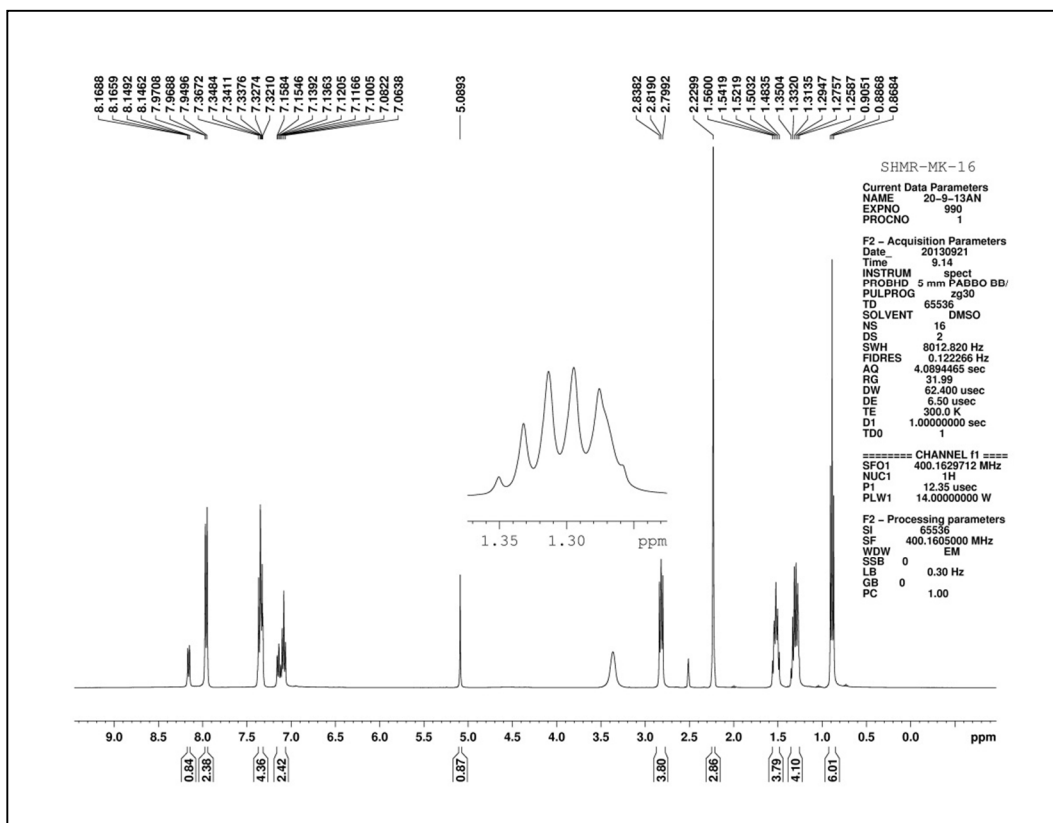

<sup>1</sup>H Spectra of 11r

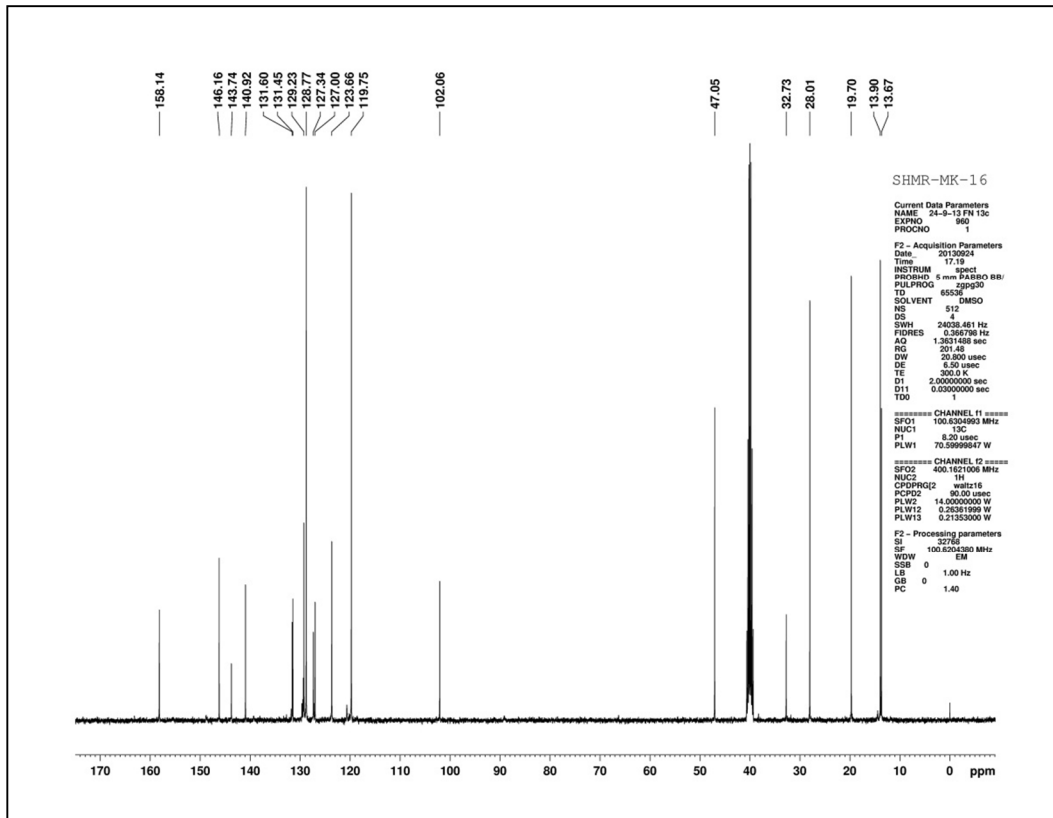

<sup>13</sup>C Spectra of 11r



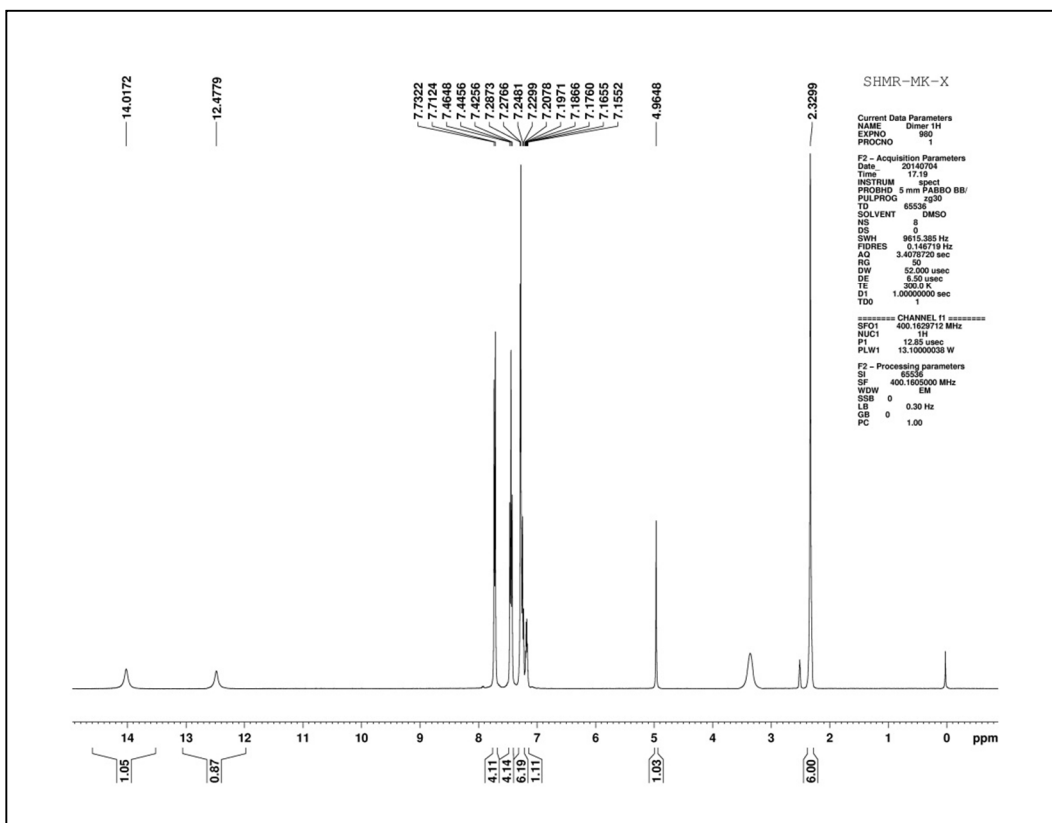

$^1\text{H}$  Spectra of 12

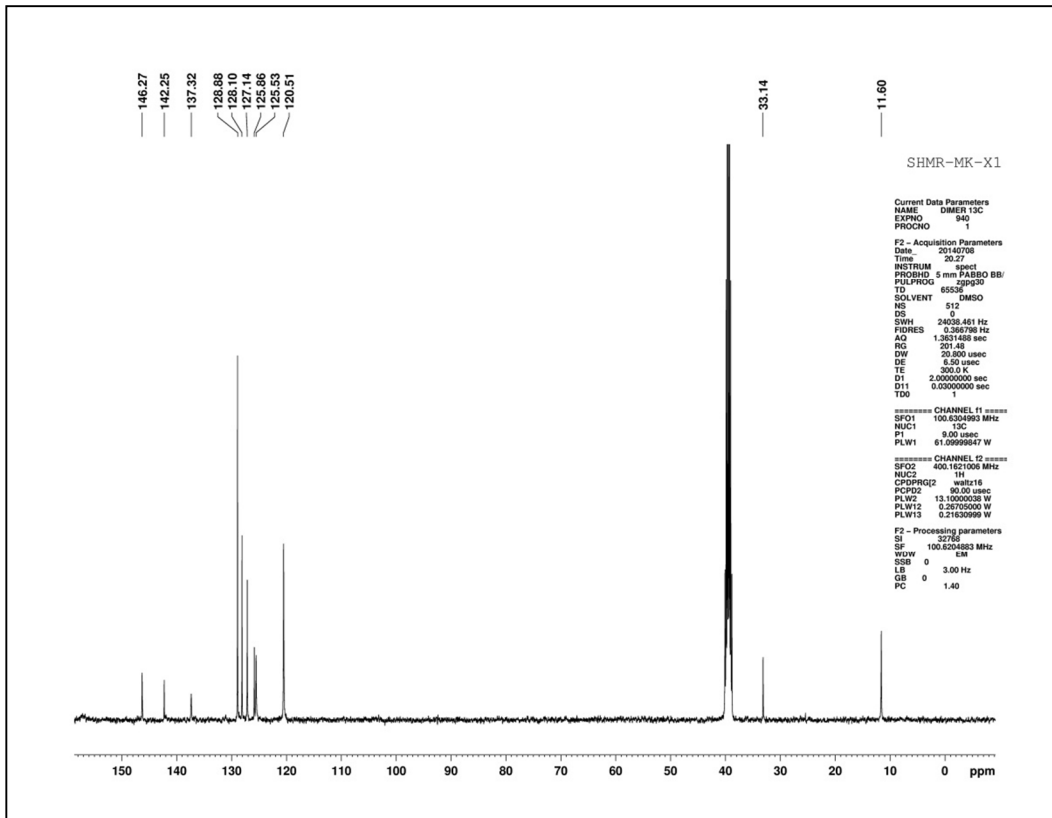

$^{13}\text{C}$  Spectra of 12

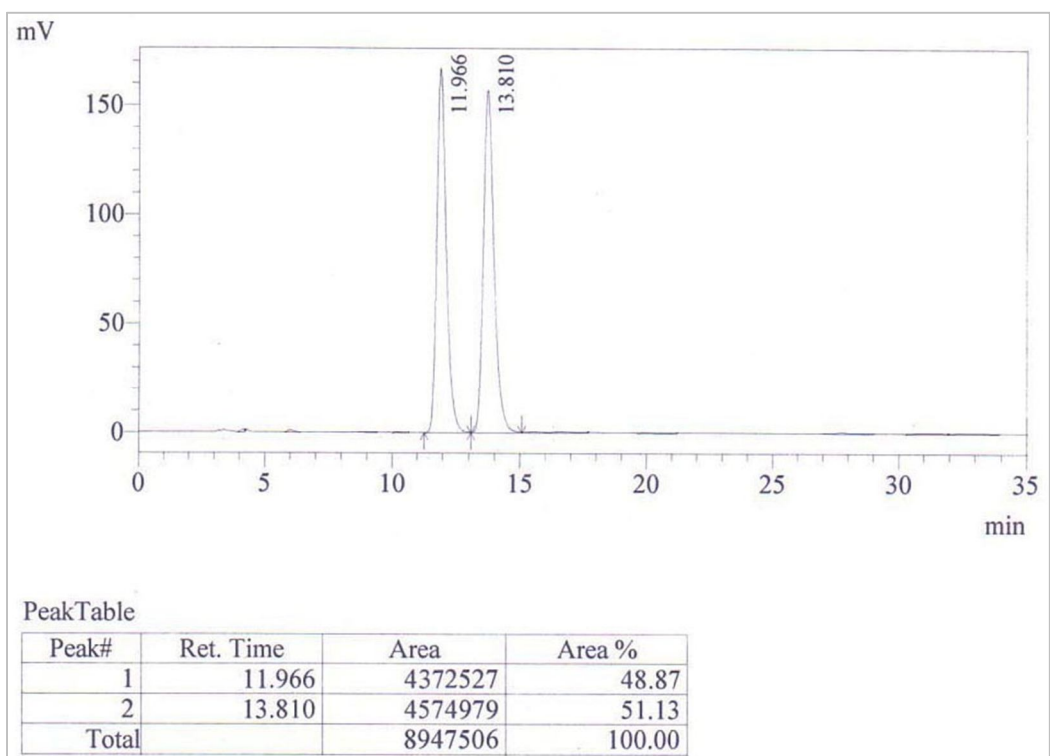

**HPLC Parameter of 11a**

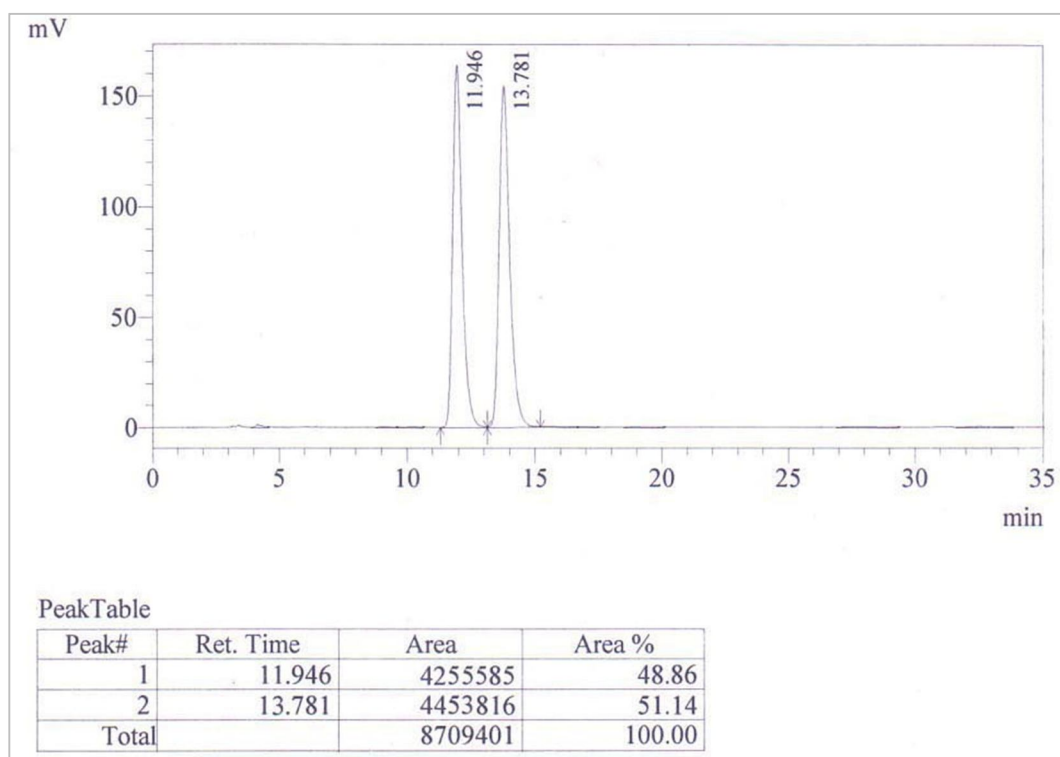

**HPLC Parameter of 11b**

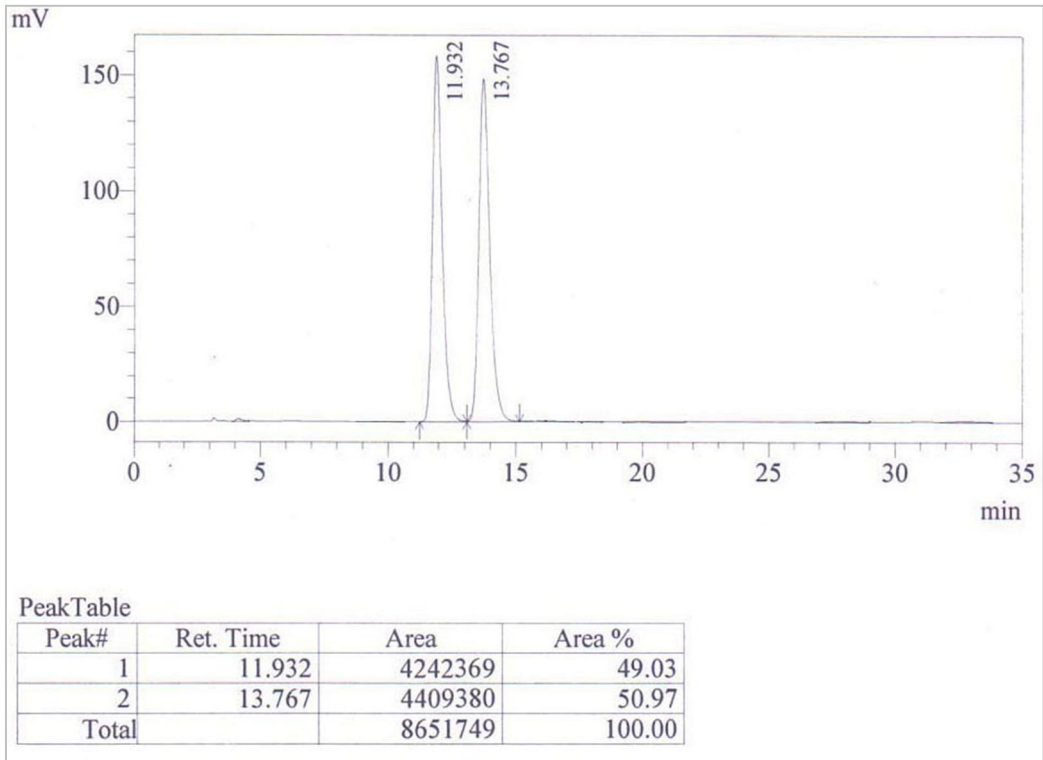

**HPLC Parameter of 11c**

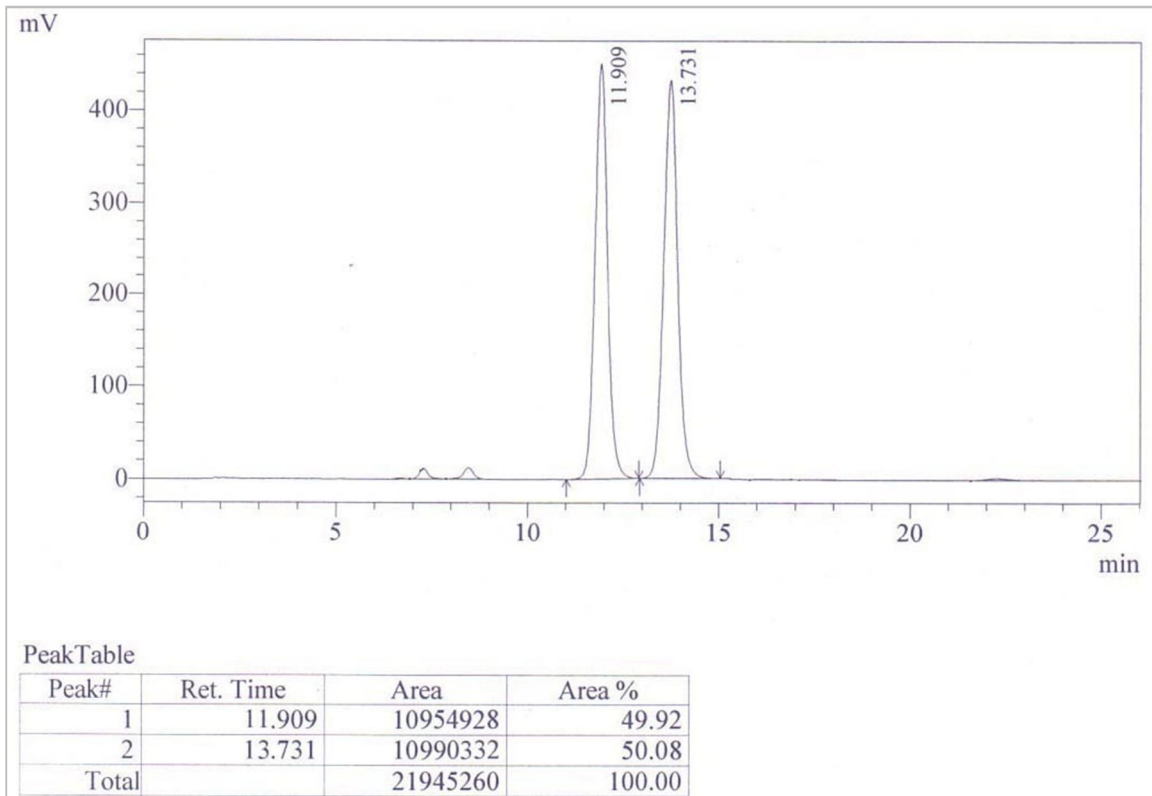

**HPLC Parameter of 11d**

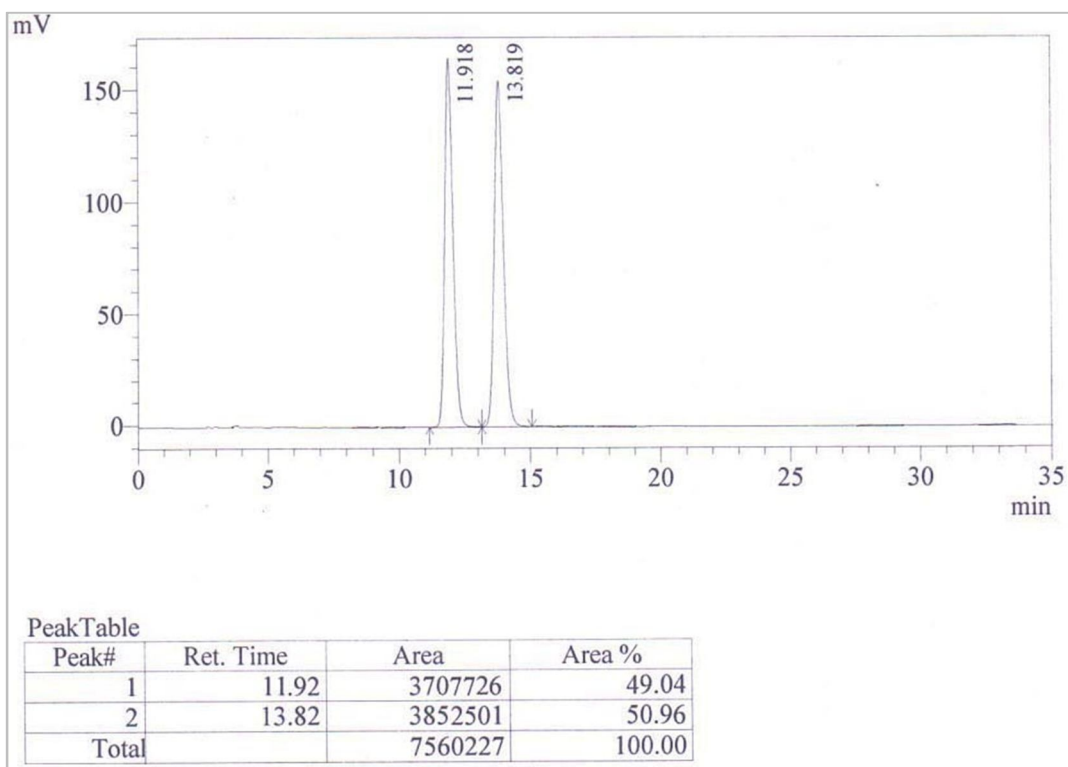

**HPLC Parameter of 11e**

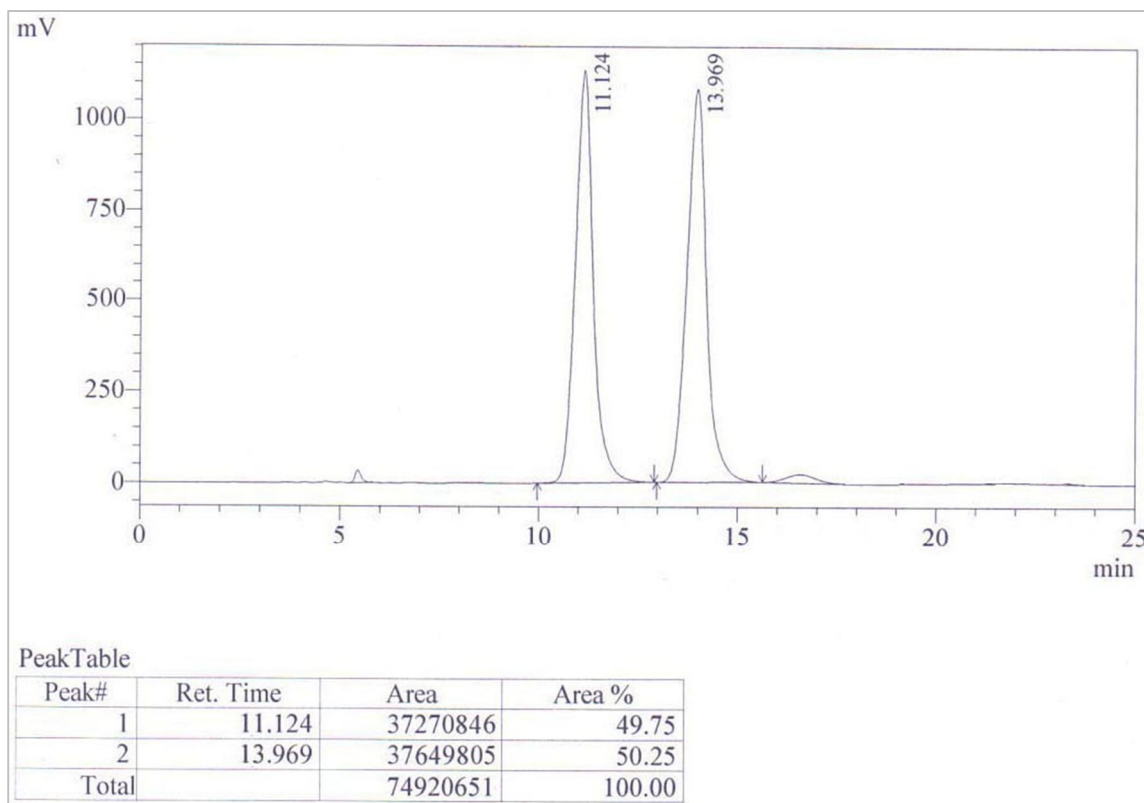

**HPLC Parameter of 11f**

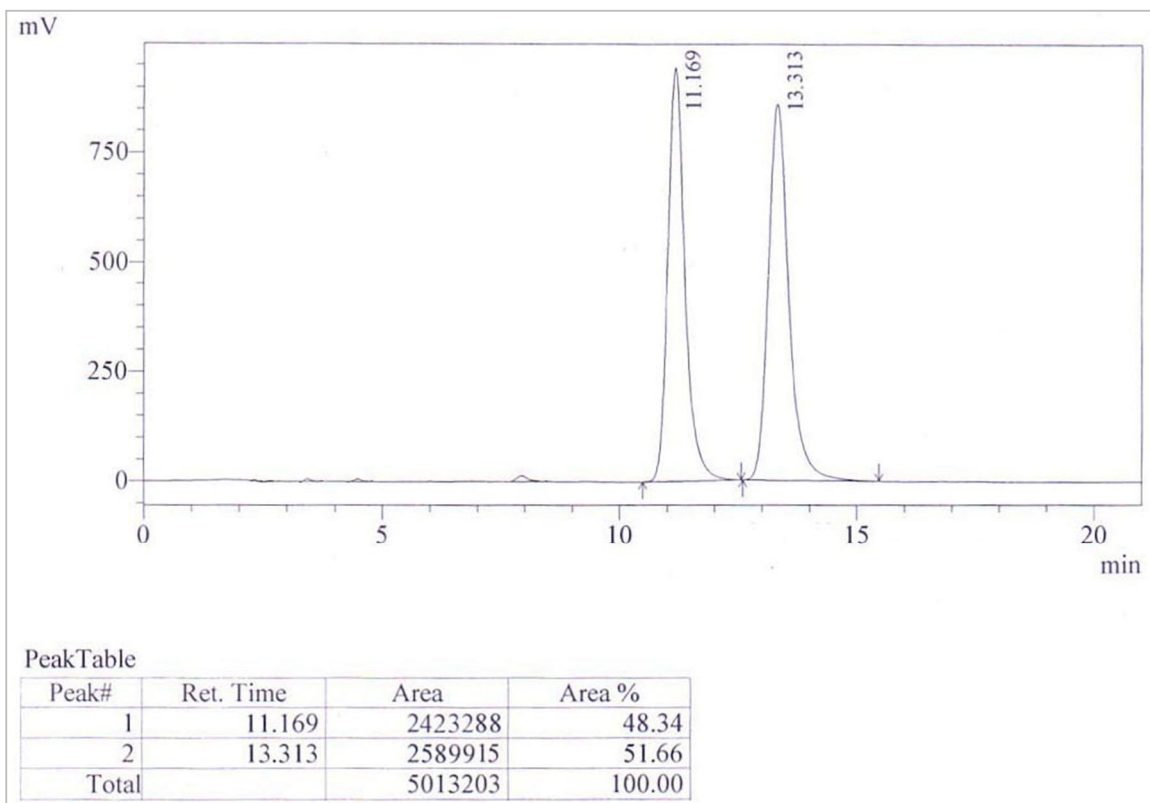

**HPLC Parameter of 11g**

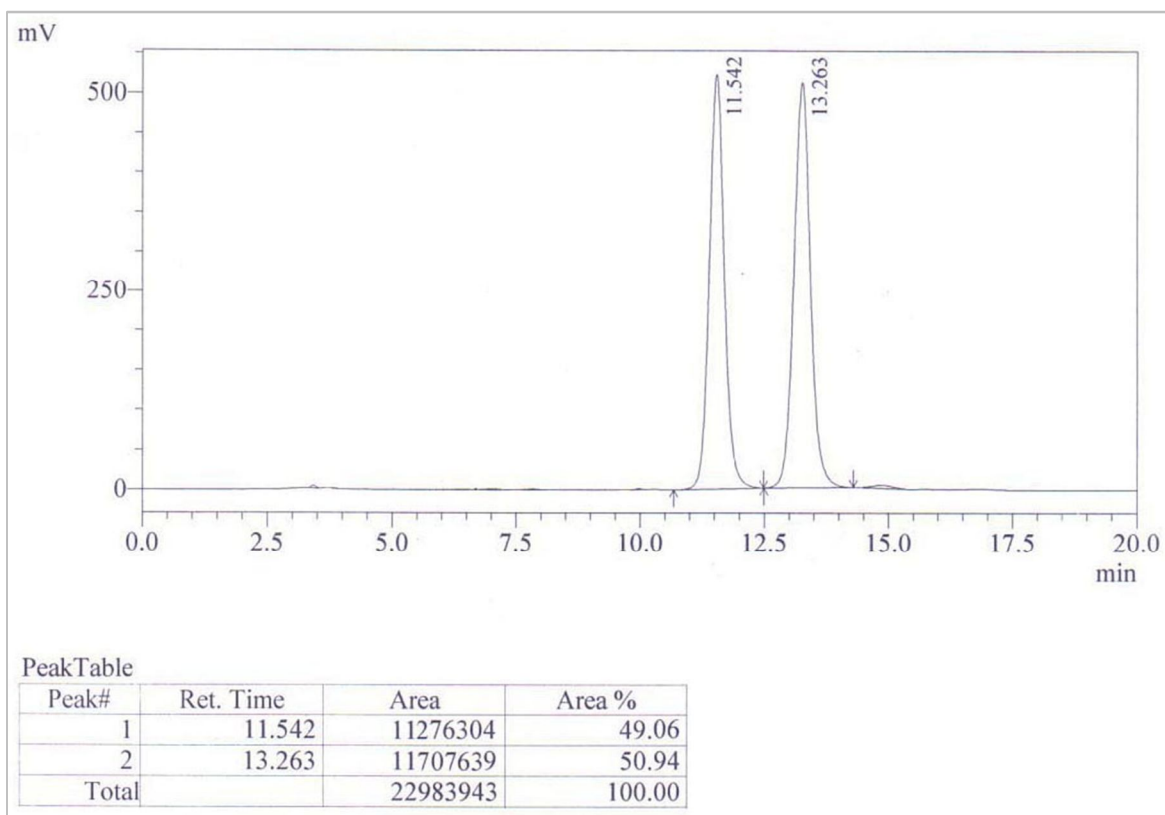

**HPLC Parameter of 11h**

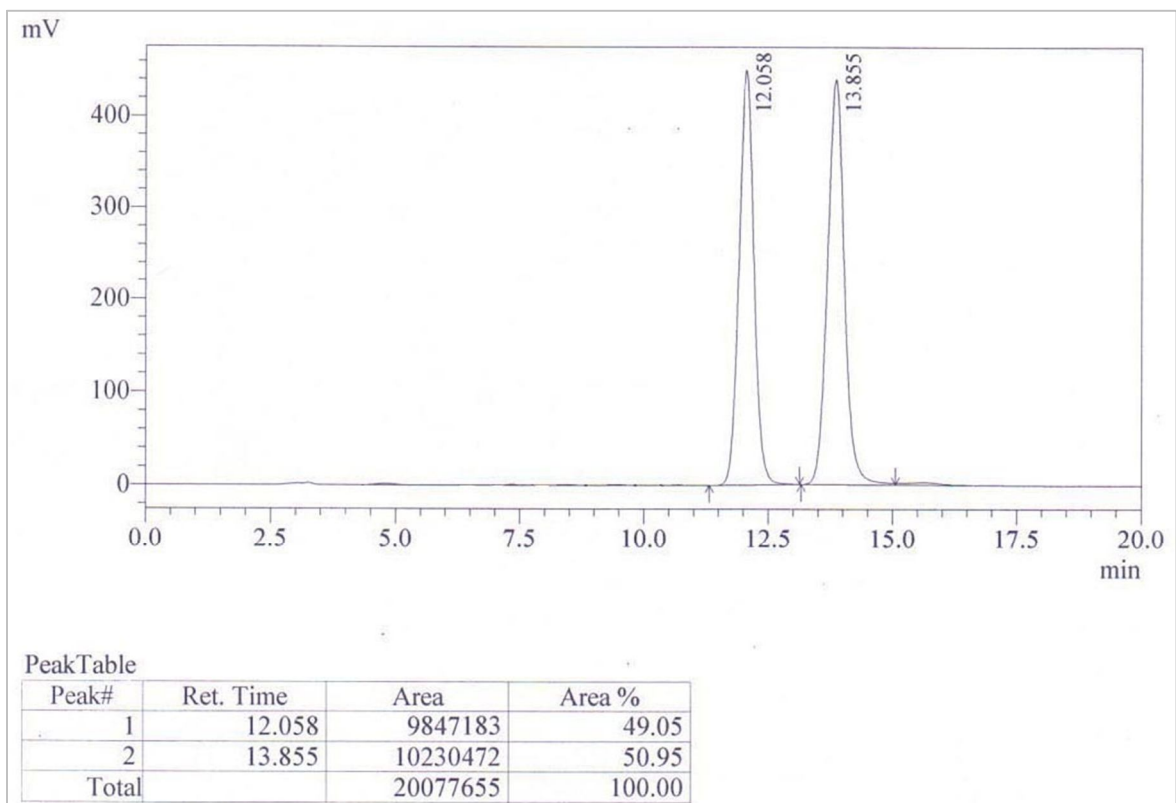

**HPLC Parameter of 11i**

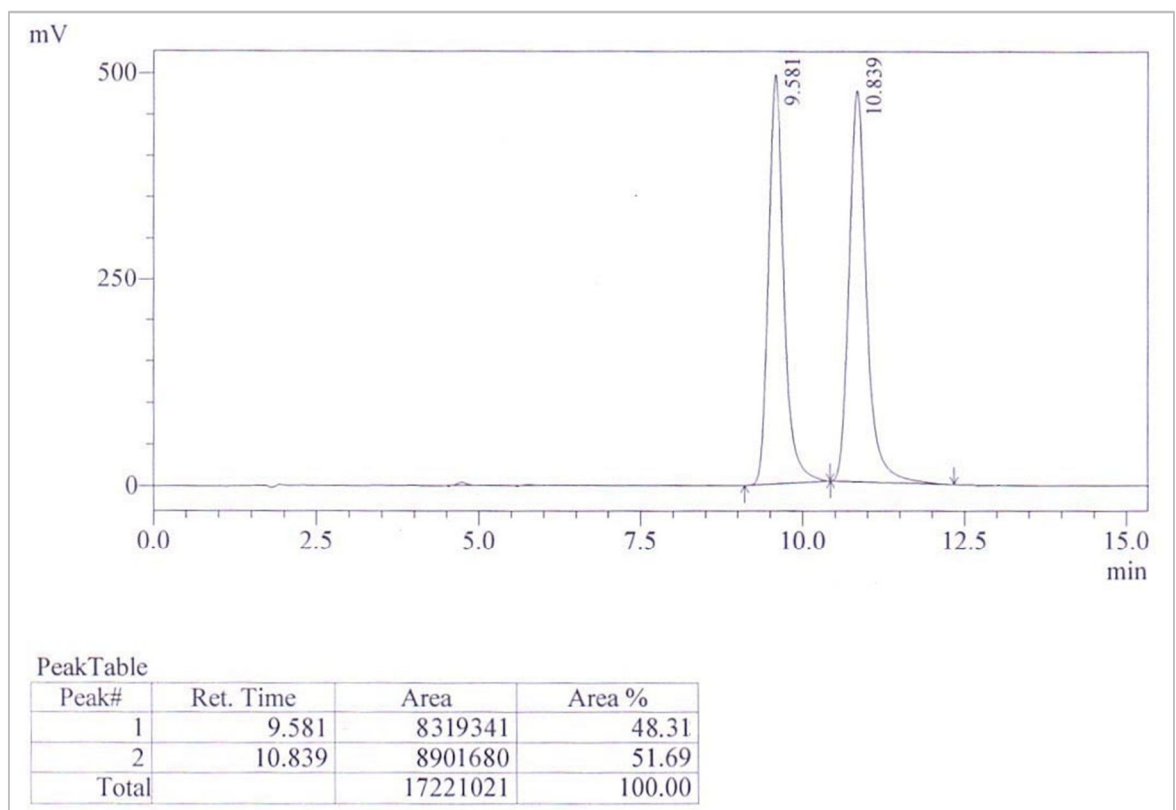

**HPLC Parameter of 11j**

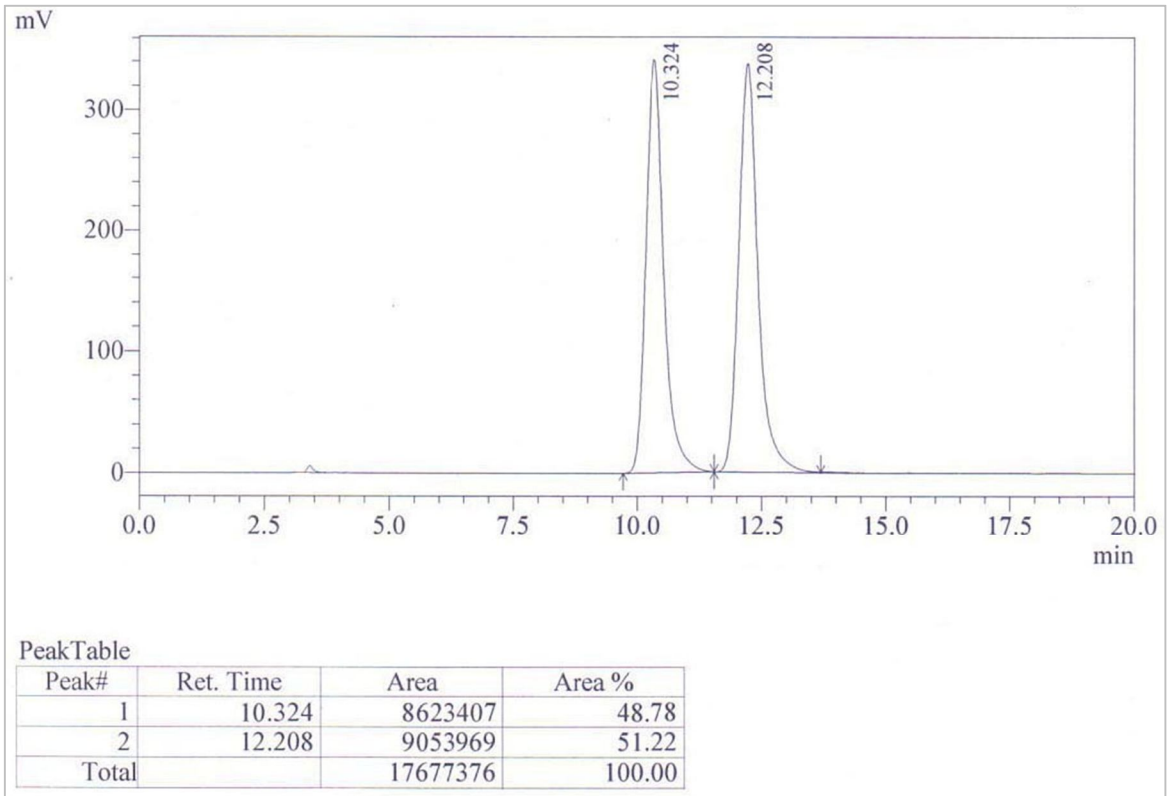

### HPLC Parameter of 11k

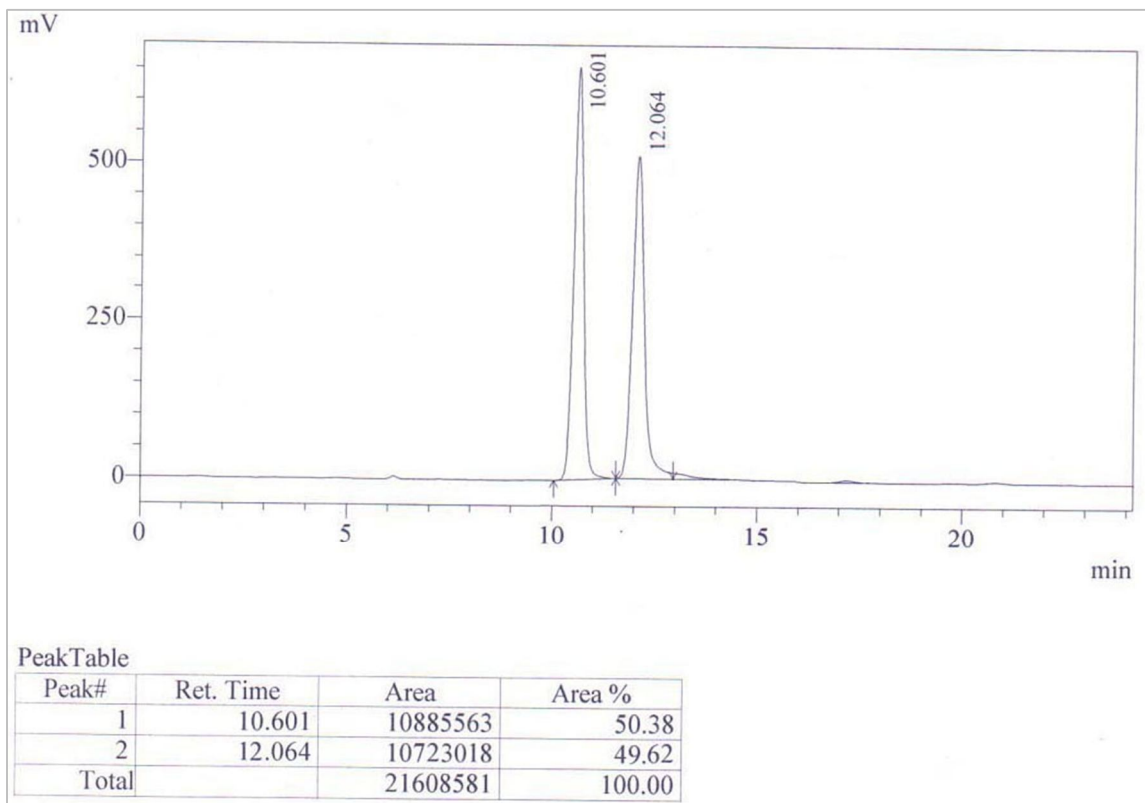

### HPLC Parameter of 11l

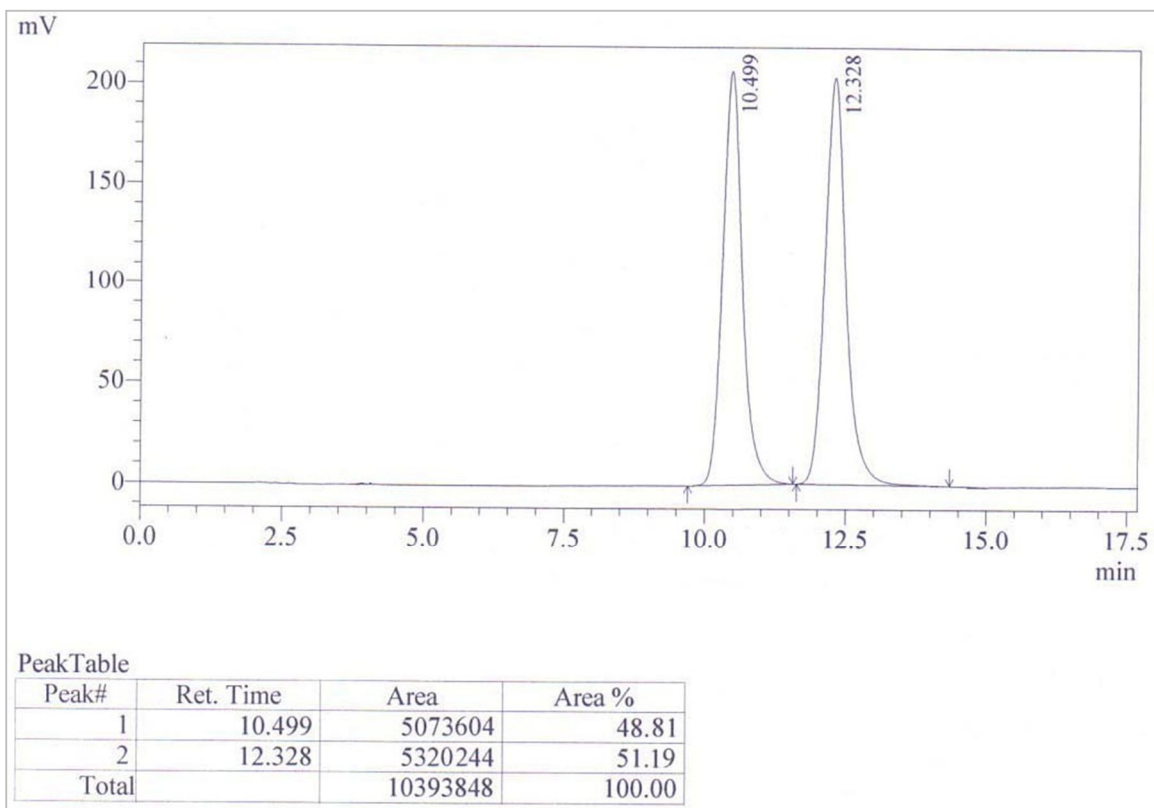

**HPLC Parameter of 11m**

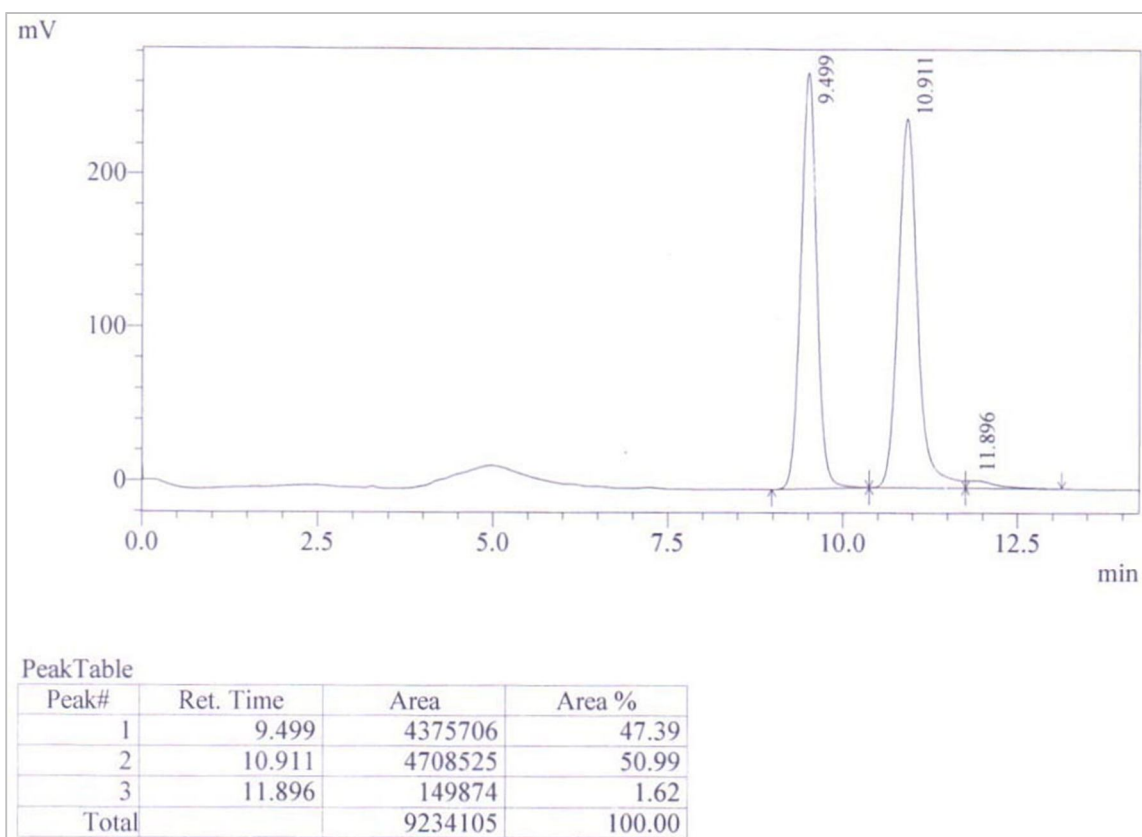

**HPLC Parameter of 11n**



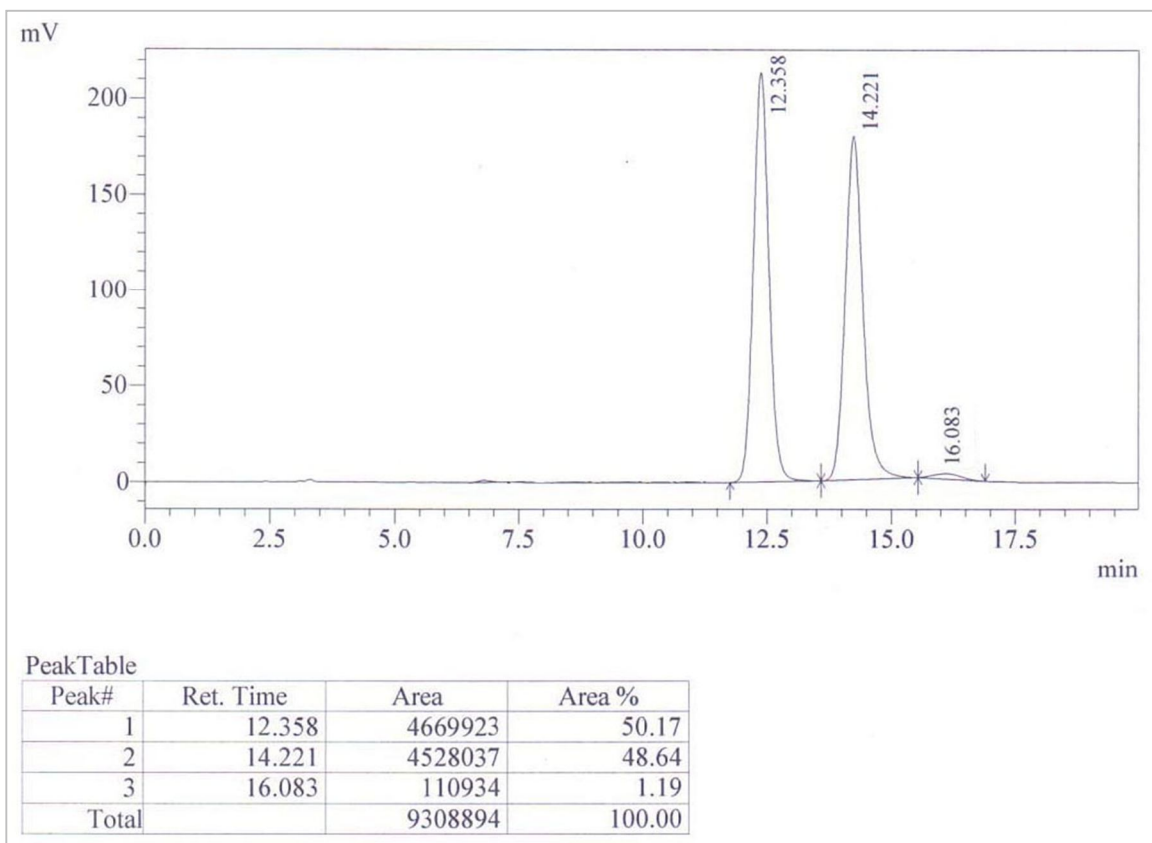

### HPLC Parameter of 11o

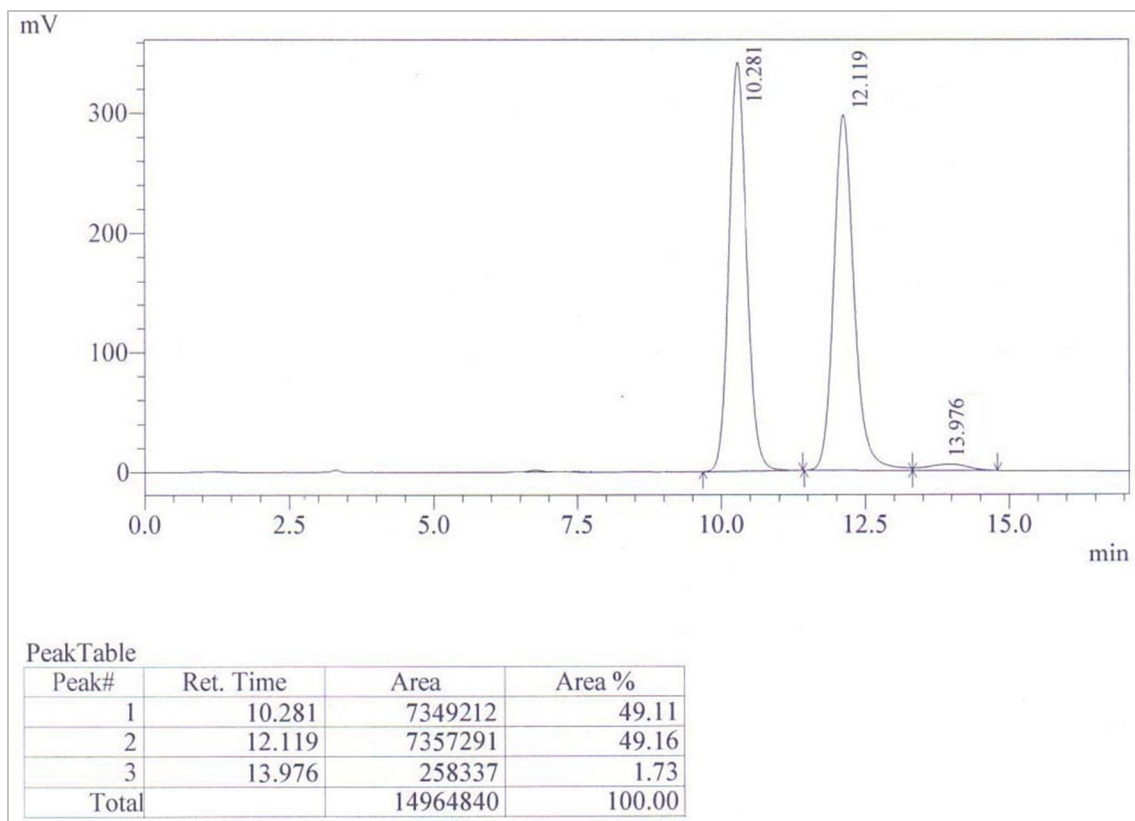

### HPLC Parameter of 11p

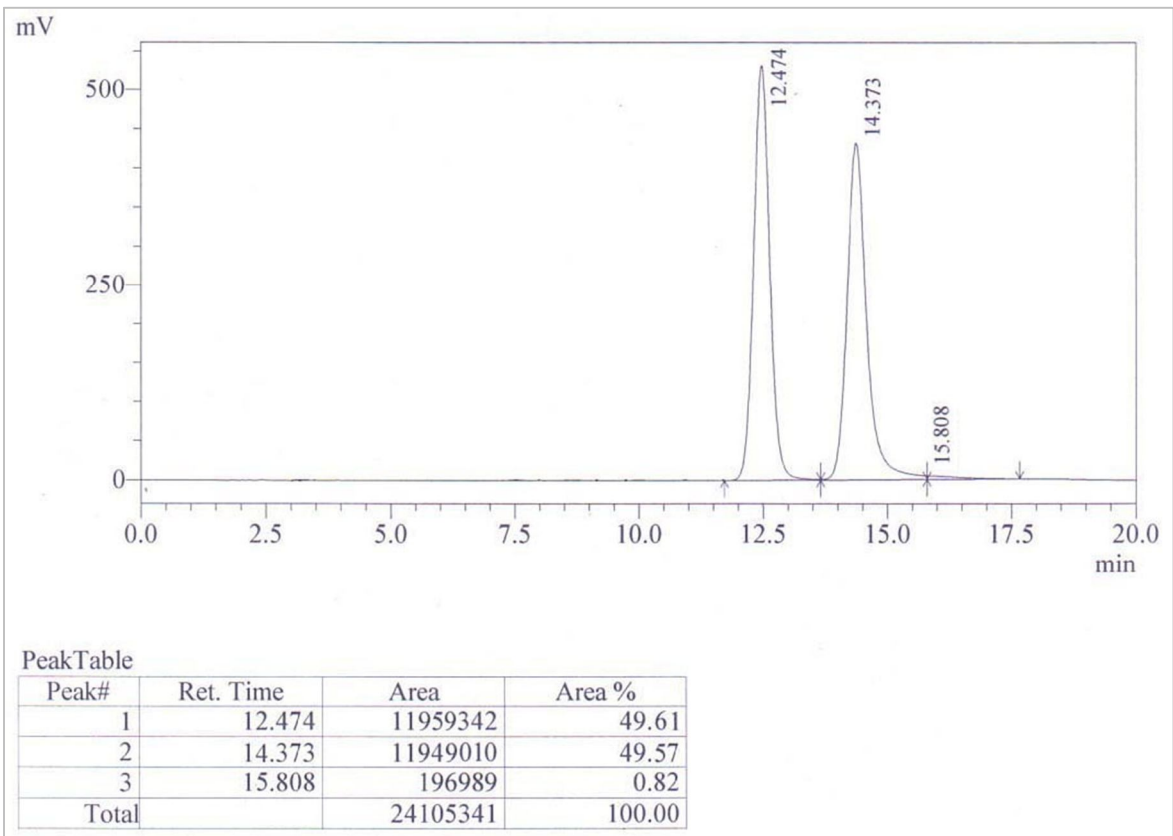

### HPLC Parameter of 11q

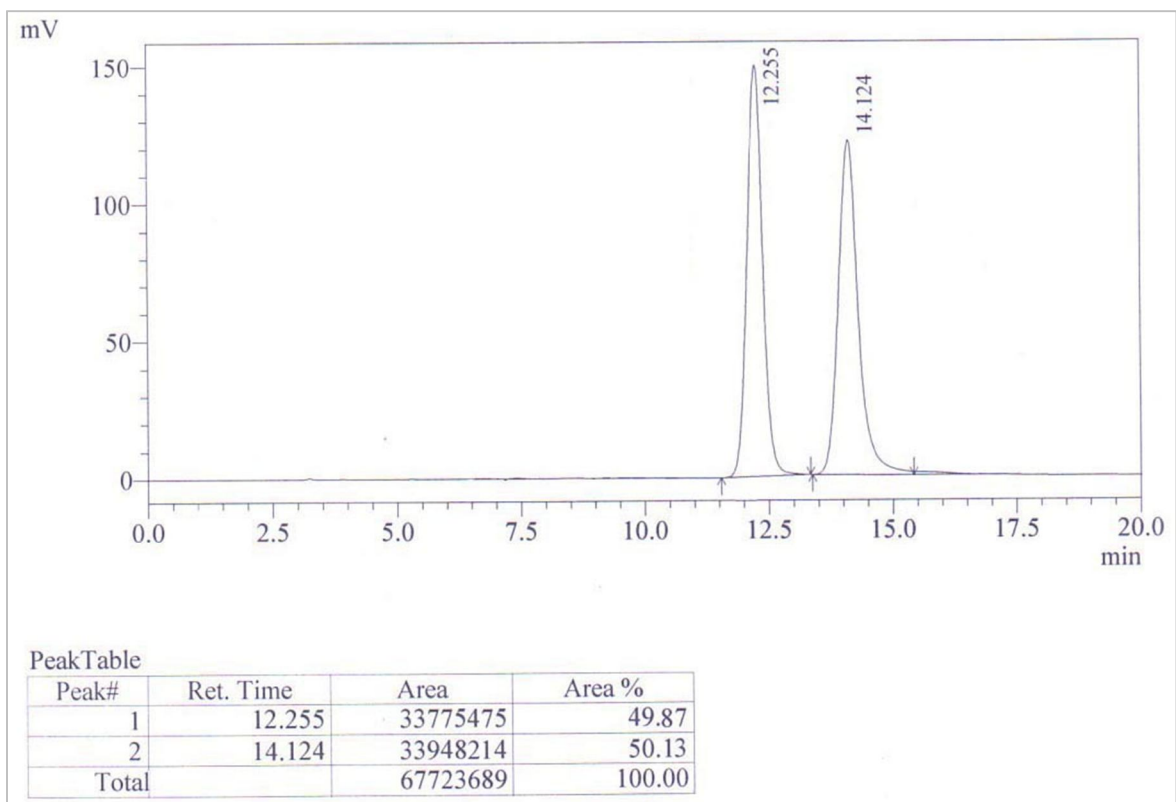

### HPLC Parameter of 11r
